# Supplementary material
Source: publisher site journal article supplement (https://www.dovepress.com/get_supplementary_file.php?f=350715-supplementary-table-S2.xlsx)
Supplement: Supplementary file 1 [file get_supplementary_file.php]

## Sheet: S_E_1_2MIC_PvsS_E
Protein accession	Protein description	Gene name	S_E_1_2MIC_P/S_E Ratio	S_E_1_2MIC_P/S_E P value	Regulated Type	MW [kDa]	Coverage [%]	Peptides	Unique peptides	PSMs	S_E_1	S_E_1_2MIC_P_1	S_E_1_2MIC_P_2	S_E_1_2MIC_P_3	S_E_2	S_E_3	Subcellular localization	KEGG KO No.	KEGG Gene	KEGG pathway	Biological Process	Cellular Component	Molecular Function	Pfam ID	Domain description	COG category	COG NO.	COG description
I6TJQ3	Tail tape measure protein OS=Staphylococcus virus IPLA5 OX=1197952 GN=IPLA5_0016 PE=4 SV=1	IPLA5_0016	1.317	0.00177362	Up	111.94	1	1	1	1	0.885	1.092	1.202	1.105	0.871	0.824	CytoplasmicMembrane
Q8CN01	Copper chaperone CopZ OS=Staphylococcus epidermidis (strain ATCC 12228 / FDA PCI 1200) OX=176280 GN=copZ PE=3 SV=1	copZ	1.221	0.000503448	Up	45.688	24.6	10	1	109	0.885	1.067	1.096	1.13	0.916	0.895	Cytoplasmic	K07213	ATOX1, ATX1, copZ, golB; copper chaperone					PF00403	Heavy-metal-associated domain	P	COG2608	Copper chaperone
Q8CRA9	Putative hemin transport system permease protein HrtB OS=Staphylococcus epidermidis (strain ATCC 12228 / FDA PCI 1200) OX=176280 GN=hrtB PE=3 SV=1	hrtB	0.785	0.00153936	Down	39.189	13.4	4	4	6	1.057	0.884	0.887	0.874	1.173	1.14	CytoplasmicMembrane	K09813	hrtB; hemin transport system permease protein	map02010 ABC transporters		GO:0005623 cell; GO:0005886 plasma membrane; GO:0016020 membrane; GO:0071944 cell periphery;				V	COG0577	ABC-type antimicrobial peptide transport system, permease component
A0A0E1VJS4	Uncharacterized protein OS=Staphylococcus epidermidis W23144 OX=525376 GN=HMPREF0791_1802 PE=4 SV=1	HMPREF0791_1802	0.75	0.0220723	Down	17.394	13.2	3	3	3	1.137	0.885	0.974	0.74	1.173	1.157	CytoplasmicMembrane
Q5HL61	Ferrous iron transport protein B OS=Staphylococcus epidermidis (strain ATCC 35984 / RP62A) OX=176279 GN=feoB PE=3 SV=1	feoB	1.237	0.0333834	Up	74.49	4.8	2	2	2	0.942	1.06	1.03	1.224	0.911	0.826	CytoplasmicMembrane	K04759	feoB; ferrous iron transport protein B					PF02421; PF07670	Ferrous iron transport protein B; Nucleoside recognition	P	COG0370	Fe2+ transport system protein B
A0A0H2WZ85	Ribonucleoside-diphosphate reductase OS=Staphylococcus aureus (strain COL) OX=93062 GN=SACOL0792 PE=3 SV=1	SACOL0792	1.347	0.00849132	Up	80.125	19.3	11	1	42	0.792	1.223	1.157	1.043	0.839	0.91	Cytoplasmic	K00525	E1.17.4.1A, nrdA, nrdE; ribonucleoside-diphosphate reductase alpha chain [EC:1.17.4.1]	map00230 Purine metabolism; map00240 Pyrimidine metabolism; map01100 Metabolic pathways	GO:0006139 nucleobase-containing compound metabolic process; GO:0006259 DNA metabolic process; GO:0006260 DNA replication; GO:0006725 cellular aromatic compound metabolic process; GO:0006753 nucleoside phosphate metabolic process; GO:0006793 phosphorus metabolic process; GO:0006796 phosphate-containing compound metabolic process; GO:0006807 nitrogen compound metabolic process; GO:0008152 metaboli…	GO:0005622 intracellular; GO:0005623 cell; GO:0005737 cytoplasm; GO:0005829 cytosol; GO:0005886 plasma membrane; GO:0005971 ribonucleoside-diphosphate reductase complex; GO:0016020 membrane; GO:0032991 protein-containing complex; GO:0071944 cell periphery; GO:1902494 catalytic complex; GO:1990204 oxidoreductase complex;	GO:0000166 nucleotide binding; GO:0003824 catalytic activity; GO:0004748 ribonucleoside-diphosphate reductase activity, thioredoxin disulfide as acceptor; GO:0005488 binding; GO:0005524 ATP binding; GO:0008144 drug binding; GO:0016491 oxidoreductase activity; GO:0016725 oxidoreductase activity, acting on CH or CH2 groups; GO:0016728 oxidoreductase activity, acting on CH or CH2 groups, disulfide a…	PF00317	Ribonucleotide reductase, all-alpha domain	F	COG0209	Ribonucleotide reductase, alpha subunit
A0A7G9EAI1	Uncharacterized protein OS=Staphylococcus epidermidis OX=1282 GN=ATM22_00890 PE=4 SV=1	ATM22_00890	0.613	0.000651755	Down	18.815	34.7	6	2	30	1.297	0.793	0.7	0.81	1.26	1.199	Extracellular
A0A0E1V915	50S ribosomal protein L29 OS=Staphylococcus epidermidis W23144 OX=525376 GN=rpmC PE=3 SV=1	rpmC	1.206	1.29055e-05	Up	47.774	17.4	8	5	26	0.915	1.086	1.098	1.087	0.896	0.901	Cytoplasmic	K02904	RP-L29, rpmC; large subunit ribosomal protein L29	map03010 Ribosome	GO:0000027 ribosomal large subunit assembly; GO:0006412 translation; GO:0006518 peptide metabolic process; GO:0006807 nitrogen compound metabolic process; GO:0006996 organelle organization; GO:0008152 metabolic process; GO:0009058 biosynthetic process; GO:0009059 macromolecule biosynthetic process; GO:0009987 cellular process; GO:0010467 gene expression; GO:0016043 cellular component organization…	GO:0005622 intracellular; GO:0005623 cell; GO:0005737 cytoplasm; GO:0005829 cytosol; GO:0005840 ribosome; GO:0015934 large ribosomal subunit; GO:0022625 cytosolic large ribosomal subunit; GO:0022626 cytosolic ribosome; GO:0032991 protein-containing complex; GO:0043226 organelle; GO:0043228 non-membrane-bounded organelle; GO:0043229 intracellular organelle; GO:0043232 intracellular non-membrane-bo…	GO:0003735 structural constituent of ribosome; GO:0005198 structural molecule activity;			J	COG0255	Ribosomal protein L29
Q8CMZ0	L-lactate dehydrogenase OS=Staphylococcus epidermidis (strain ATCC 12228 / FDA PCI 1200) OX=176280 GN=ldh PE=3 SV=1	ldh	0.564	0.0410966	Down	34.101	45.6	14	1	130	1.513	0.691	0.535	0.974	1.312	1.076	Cytoplasmic	K00016	LDH, ldh; L-lactate dehydrogenase [EC:1.1.1.27]	map00010 Glycolysis / Gluconeogenesis; map00270 Cysteine and methionine metabolism; map00620 Pyruvate metabolism; map00640 Propanoate metabolism; map01100 Metabolic pathways; map01110 Biosynthesis of secondary metabolites; map01120 Microbial metabolism in diverse environments; map01130 Biosynthesis of antibiotics				PF02866	lactate/malate dehydrogenase, alpha/beta C-terminal domain	C	COG0039	Malate/lactate dehydrogenases
D4FN05	Uncharacterized protein OS=Staphylococcus epidermidis M23864:W2(grey) OX=525375 GN=HMPREF0794_1943 PE=4 SV=1	HMPREF0794_1943	2.57	0.0360806	Up	89.115	7.2	5	1	10	0.505	0.756	1.82	1.659	0.554	0.589	Unknown
Q8CS61	Putative universal stress protein SE_1385 OS=Staphylococcus epidermidis (strain ATCC 12228 / FDA PCI 1200) OX=176280 GN=SE_1385 PE=3 SV=1	SE_1385	1.217	0.000450026	Up	18.423	71.7	10	1	107	0.916	1.083	1.117	1.077	0.872	0.904	Unknown							PF00582	Universal stress protein family	T	COG0589	Universal stress protein UspA and related nucleotide-binding proteins
A0A509LV09	Uncharacterized protein OS=Staphylococcus epidermidis OX=1282 GN=D9V05_01045 PE=4 SV=1	D9V05_01045	1.971	0.0102845	Up	13.462	9.5	1	1	1	0.711	1.211	1.464	1.24	0.494	0.781	Unknown
A0A6N4J108	mRNA interferase OS=Staphylococcus epidermidis OX=1282 GN=E1N09_00320 PE=3 SV=1	E1N09_00320	0.833	0.00180717	Down	12.468	54.1	4	4	6	1.146	0.917	0.914	0.909	1.053	1.09	Unknown	K07171	mazF, ndoA, chpA; mRNA interferase MazF [EC:3.1.-.-]					PF02452	PemK-like protein	L	COG2337	Growth inhibitor
Q5HN72	NADH-dependent peroxiredoxin OS=Staphylococcus epidermidis (strain ATCC 35984 / RP62A) OX=176279 GN=bcp PE=4 SV=1	bcp	1.401	0.00598448	Up	37.344	40.2	12	2	46	0.881	1.11	1.072	1.268	0.78	0.801	Cytoplasmic	K03564	BCP, PRXQ, DOT5; peroxiredoxin Q/BCP [EC:1.11.1.15]		GO:0006950 response to stress; GO:0006979 response to oxidative stress; GO:0008152 metabolic process; GO:0009636 response to toxic substance; GO:0009987 cellular process; GO:0042221 response to chemical; GO:0050896 response to stimulus; GO:0051716 cellular response to stimulus; GO:0055114 oxidation-reduction process; GO:0070887 cellular response to chemical stimulus; GO:0097237 cellular response …	GO:0005622 intracellular; GO:0005623 cell; GO:0005737 cytoplasm; GO:0005829 cytosol; GO:0005886 plasma membrane; GO:0016020 membrane; GO:0071944 cell periphery;	GO:0003824 catalytic activity; GO:0004601 peroxidase activity; GO:0008379 thioredoxin peroxidase activity; GO:0016209 antioxidant activity; GO:0016491 oxidoreductase activity; GO:0016667 oxidoreductase activity, acting on a sulfur group of donors; GO:0016671 oxidoreductase activity, acting on a sulfur group of donors, disulfide as acceptor; GO:0016684 oxidoreductase activity, acting on peroxide a…	PF00578	AhpC/TSA family	O	COG1225	Peroxiredoxin
Q8CRQ8	Redox-sensing transcriptional repressor Rex OS=Staphylococcus epidermidis (strain ATCC 12228 / FDA PCI 1200) OX=176280 GN=rex PE=3 SV=1	rex	0.8	0.0269884	Down	23.829	40.3	6	6	11	1.174	0.876	0.828	0.988	1.158	1.034	Cytoplasmic	K01926	rex; redox-sensing transcriptional repressor					PF02629	CoA binding domain	K	COG2344	AT-rich DNA-binding protein
D4FLK6	Serine protease OS=Staphylococcus epidermidis M23864:W2(grey) OX=525375 GN=HMPREF0794_1444 PE=3 SV=1	HMPREF0794_1444	0.714	0.00182628	Down	71.857	17.7	10	5	12	1.164	0.83	0.916	0.784	1.184	1.194	Unknown	K01318	sspA; glutamyl endopeptidase [EC:3.4.21.19]	map02024 Quorum sensing				PF13365	Trypsin-like peptidase domain	E	COG3591	V8-like Glu-specific endopeptidase
A0A1U9X4C2	Lactose phosphotransferase system repressor OS=Staphylococcus epidermidis OX=1282 GN=aadE PE=4 SV=1	aadE	0.777	0.0040854	Down	28.247	3.8	1	1	1	1.168	0.894	0.818	0.94	1.129	1.116	Cytoplasmic	K05593	aadK; aminoglycoside 6-adenylyltransferase [EC:2.7.7.-]					PF08279	HTH domain
A0A0H2VGU2	Aldehyde-alcohol dehydrogenase OS=Staphylococcus epidermidis (strain ATCC 12228 / FDA PCI 1200) OX=176280 GN=SE_0506 PE=3 SV=1	SE_0506	0.824	0.0243893	Down	95.598	75.4	51	5	362	1.108	0.938	0.815	0.98	1.094	1.116	Cytoplasmic	K04072	adhE; acetaldehyde dehydrogenase / alcohol dehydrogenase [EC:1.2.1.10 1.1.1.1]	map00010 Glycolysis / Gluconeogenesis; map00071 Fatty acid degradation; map00350 Tyrosine metabolism; map00620 Pyruvate metabolism; map00625 Chloroalkane and chloroalkene degradation; map00626 Naphthalene degradation; map00650 Butanoate metabolism; map01100 Metabolic pathways; map01110 Biosynthesis of secondary metabolites; map01120 Microbial metabolism in diverse environments; map01130 Biosynthe…						C	COG1454	Alcohol dehydrogenase, class IV
Q5HGD6	DNA mismatch repair protein MutS OS=Staphylococcus aureus (strain COL) OX=93062 GN=mutS PE=3 SV=1	mutS	1.287	0.0105293	Up	99.902	14.2	17	1	39	0.832	1.091	1.226	1.045	0.864	0.916	Cytoplasmic	K03555	mutS; DNA mismatch repair protein MutS	map03430 Mismatch repair	GO:0006139 nucleobase-containing compound metabolic process; GO:0006259 DNA metabolic process; GO:0006281 DNA repair; GO:0006298 mismatch repair; GO:0006725 cellular aromatic compound metabolic process; GO:0006807 nitrogen compound metabolic process; GO:0006950 response to stress; GO:0006974 cellular response to DNA damage stimulus; GO:0008152 metabolic process; GO:0009987 cellular process; GO:00…	GO:0005622 intracellular; GO:0005623 cell; GO:0032300 mismatch repair complex; GO:0032991 protein-containing complex; GO:1990391 DNA repair complex;	GO:0003676 nucleic acid binding; GO:0003677 DNA binding; GO:0003684 damaged DNA binding; GO:0003690 double-stranded DNA binding; GO:0003824 catalytic activity; GO:0005488 binding; GO:0008094 DNA-dependent ATPase activity; GO:0016462 pyrophosphatase activity; GO:0016787 hydrolase activity; GO:0016817 hydrolase activity, acting on acid anhydrides; GO:0016818 hydrolase activity, acting on acid anhyd…	PF01624; PF05188; PF05192; PF05190; PF00488	MutS domain I; MutS domain II; MutS domain III; MutS family domain IV; MutS domain V	L	COG0249	Mismatch repair ATPase (MutS family)
A0A3G1RLZ5	Accumulation-associated protein OS=Staphylococcus epidermidis OX=1282 PE=4 SV=1	--	0.682	0.0479059	Down	131.48	40.9	36	1	181	1.238	0.795	0.675	1.005	1.352	1.041	Cellwall	K14195	sasG; surface protein G	map05150 Staphylococcus aureus infection				PF07501	G5 domain	DM	COG4932	Predicted outer membrane protein
Q8CU42	Carbamate kinase 2 OS=Staphylococcus epidermidis (strain ATCC 12228 / FDA PCI 1200) OX=176280 GN=arcC2 PE=3 SV=1	arcC2	0.633	2.79319e-05	Down	33.157	47.2	14	14	43	1.253	0.815	0.761	0.775	1.235	1.228	Unknown	K00926	arcC; carbamate kinase [EC:2.7.2.2]	map00220 Arginine biosynthesis; map00230 Purine metabolism; map00910 Nitrogen metabolism; map01100 Metabolic pathways; map01120 Microbial metabolism in diverse environments; map01200 Carbon metabolism						E	COG0549	Carbamate kinase
Q8CPM1	Protoheme IX farnesyltransferase OS=Staphylococcus epidermidis (strain ATCC 12228 / FDA PCI 1200) OX=176280 GN=ctaB PE=3 SV=2	ctaB	1.544	0.000182173	Up	33.62	6.3	2	2	2	0.772	1.202	1.171	1.238	0.745	0.821	CytoplasmicMembrane	K02257	COX10, ctaB, cyoE; heme o synthase [EC:2.5.1.141]	map00190 Oxidative phosphorylation; map00860 Porphyrin and chlorophyll metabolism; map01100 Metabolic pathways; map01110 Biosynthesis of secondary metabolites	GO:0006091 generation of precursor metabolites and energy; GO:0006725 cellular aromatic compound metabolic process; GO:0006778 porphyrin-containing compound metabolic process; GO:0006779 porphyrin-containing compound biosynthetic process; GO:0006783 heme biosynthetic process; GO:0006807 nitrogen compound metabolic process; GO:0008152 metabolic process; GO:0009058 biosynthetic process; GO:0009987 …	GO:0005623 cell; GO:0005886 plasma membrane; GO:0016020 membrane; GO:0071944 cell periphery;	GO:0003824 catalytic activity; GO:0004311 farnesyltranstransferase activity; GO:0004659 prenyltransferase activity; GO:0016740 transferase activity; GO:0016765 transferase activity, transferring alkyl or aryl (other than methyl) groups;			O	COG0109	Polyprenyltransferase (cytochrome oxidase assembly factor)
Q5HNM7	Uncharacterized protein OS=Staphylococcus epidermidis (strain ATCC 35984 / RP62A) OX=176279 GN=SERP1240 PE=4 SV=1	SERP1240	1.219	0.00219485	Up	97.134	8.4	7	1	12	0.92	1.091	1.066	1.131	0.859	0.918	Cytoplasmic
A0A0H2WW14	Uncharacterized protein OS=Staphylococcus aureus (strain COL) OX=93062 GN=SACOL1480 PE=4 SV=1	SACOL1480	0.769	0.0297589	Down	133.11	3.8	4	1	9	1.18	0.928	0.755	0.957	1.177	1.074	Unknown				GO:0000910 cytokinesis; GO:0007049 cell cycle; GO:0009987 cellular process; GO:0016043 cellular component organization; GO:0022402 cell cycle process; GO:0022607 cellular component assembly; GO:0032506 cytokinetic process; GO:0044085 cellular component biogenesis; GO:0051301 cell division; GO:0071840 cellular component organization or biogenesis; GO:0090529 cell septum assembly;	GO:0016020 membrane; GO:0016021 integral component of membrane; GO:0031224 intrinsic component of membrane;	GO:0003824 catalytic activity; GO:0003924 GTPase activity; GO:0016462 pyrophosphatase activity; GO:0016787 hydrolase activity; GO:0016817 hydrolase activity, acting on acid anhydrides; GO:0016818 hydrolase activity, acting on acid anhydrides, in phosphorus-containing anhydrides; GO:0017111 nucleoside-triphosphatase activity;	PF00350	Dynamin family	S	COG0699	Predicted GTPases (dynamin-related)
A0A7I0B7G9	Uncharacterized protein (Fragment) OS=Staphylococcus epidermidis OX=1282 GN=E1N10_09780 PE=4 SV=1	E1N10_09780	1.345	2.07664e-05	Up	4.8543	64.3	6	6	46	0.859	1.122	1.162	1.132	0.842	0.839	Unknown
Q5HLH9	Cation efflux family protein OS=Staphylococcus epidermidis (strain ATCC 35984 / RP62A) OX=176279 GN=SERP2008 PE=4 SV=1	SERP2008	1.205	0.00162214	Up	32.667	8.2	3	2	3	0.925	1.137	1.074	1.062	0.886	0.906	CytoplasmicMembrane									P	COG0053	Predicted Co/Zn/Cd cation transporters
D4FJZ0	Peptide deformylase OS=Staphylococcus epidermidis M23864:W2(grey) OX=525375 GN=def PE=3 SV=1	def	1.244	0.00166553	Up	75.094	17	11	1	80	0.838	1.01	1.088	1.057	0.877	0.822	Cytoplasmic	K01462	PDF, def; peptide deformylase [EC:3.5.1.88]		GO:0006464 cellular protein modification process; GO:0006807 nitrogen compound metabolic process; GO:0008152 metabolic process; GO:0009987 cellular process; GO:0018193 peptidyl-amino acid modification; GO:0018206 peptidyl-methionine modification; GO:0019538 protein metabolic process; GO:0031365 N-terminal protein amino acid modification; GO:0036211 protein modification process; GO:0043170 macromo…		GO:0003824 catalytic activity; GO:0016787 hydrolase activity; GO:0016810 hydrolase activity, acting on carbon-nitrogen (but not peptide) bonds; GO:0016811 hydrolase activity, acting on carbon-nitrogen (but not peptide) bonds, in linear amides; GO:0042586 peptide deformylase activity;	PF01327	Polypeptide deformylase	J	COG0242	N-formylmethionyl-tRNA deformylase
A0A0H2VEK3	Transcriptional regulator tetR-family OS=Staphylococcus epidermidis (strain ATCC 12228 / FDA PCI 1200) OX=176280 GN=SE_0093 PE=4 SV=1	SE_0093	1.208	0.00255924	Up	21.471	20.4	5	5	6	0.899	1.027	1.096	1.113	0.91	0.87	Unknown							PF00440; PF14278	Bacterial regulatory proteins, tetR family; Transcriptional regulator C-terminal region	K	COG1309	Transcriptional regulator
Q5HQE5	Uncharacterized protein OS=Staphylococcus epidermidis (strain ATCC 35984 / RP62A) OX=176279 GN=SERP0608 PE=4 SV=1	SERP0608	1.223	0.0138377	Up	95.543	26.6	20	1	47	0.816	1.078	1.127	1.085	0.931	0.944	Unknown
A0A7I0AL81	Phenylalanine--tRNA ligase beta subunit OS=Staphylococcus epidermidis OX=1282 GN=pheT PE=3 SV=1	pheT	0.752	0.00188074	Down	89.374	29.8	20	1	58	1.138	0.826	0.843	0.935	1.153	1.171	Cytoplasmic	K01890	FARSB, pheT; phenylalanyl-tRNA synthetase beta chain [EC:6.1.1.20]	map00970 Aminoacyl-tRNA biosynthesis	GO:0006082 organic acid metabolic process; GO:0006139 nucleobase-containing compound metabolic process; GO:0006399 tRNA metabolic process; GO:0006412 translation; GO:0006418 tRNA aminoacylation for protein translation; GO:0006432 phenylalanyl-tRNA aminoacylation; GO:0006518 peptide metabolic process; GO:0006520 cellular amino acid metabolic process; GO:0006725 cellular aromatic compound metabolic…	GO:0005618 cell wall; GO:0005622 intracellular; GO:0005623 cell; GO:0005737 cytoplasm; GO:0005829 cytosol; GO:0005886 plasma membrane; GO:0009328 phenylalanine-tRNA ligase complex; GO:0016020 membrane; GO:0030312 external encapsulating structure; GO:0032991 protein-containing complex; GO:0071944 cell periphery; GO:1902494 catalytic complex;	GO:0003824 catalytic activity; GO:0004812 aminoacyl-tRNA ligase activity; GO:0004826 phenylalanine-tRNA ligase activity; GO:0005488 binding; GO:0005515 protein binding; GO:0016874 ligase activity; GO:0016875 ligase activity, forming carbon-oxygen bonds; GO:0042802 identical protein binding; GO:0140098 catalytic activity, acting on RNA; GO:0140101 catalytic activity, acting on a tRNA;	PF01588; PF03483; PF03484; PF03147	Putative tRNA binding domain; B3/4 domain; tRNA synthetase B5 domain; Ferredoxin-fold anticodon binding domain	J	COG0073	EMAP domain
Q8CMZ9	Probable transglycosylase IsaA OS=Staphylococcus epidermidis (strain ATCC 12228 / FDA PCI 1200) OX=176280 GN=isaA PE=3 SV=1	isaA	0.831	0.000260632	Down	24.547	42.6	6	6	318	1.103	0.901	0.891	0.932	1.078	1.098	Extracellular							PF06737	Transglycosylase-like domain	M	COG0741	Soluble lytic murein transglycosylase and related regulatory proteins (some contain LysM/invasin domains)
Q5HIG6	tRNA(Ile)-lysidine synthase OS=Staphylococcus aureus (strain COL) OX=93062 GN=tilS PE=3 SV=1	tilS	1.269	0.00406503	Up	51.291	2.1	1	1	1	0.882	1.087	1.202	1.057	0.89	0.864	Cytoplasmic	K04075	tilS, mesJ; tRNA(Ile)-lysidine synthase [EC:6.3.4.19]					PF11734	TilS substrate C-terminal domain	D	COG0037	Predicted ATPase of the PP-loop superfamily implicated in cell cycle control
Q5HJF4	Formate acetyltransferase OS=Staphylococcus aureus (strain COL) OX=93062 GN=pflB PE=1 SV=1	pflB	0.65	0.00415347	Down	84.861	27.4	21	2	137	1.271	0.801	0.701	0.899	1.23	1.195	Cytoplasmic	K00656	E2.3.1.54, pflD; formate C-acetyltransferase [EC:2.3.1.54]	map00620 Pyruvate metabolism; map00640 Propanoate metabolism; map00650 Butanoate metabolism; map01100 Metabolic pathways; map01120 Microbial metabolism in diverse environments	GO:0006082 organic acid metabolic process; GO:0006520 cellular amino acid metabolic process; GO:0006566 threonine metabolic process; GO:0006567 threonine catabolic process; GO:0006807 nitrogen compound metabolic process; GO:0008152 metabolic process; GO:0009056 catabolic process; GO:0009063 cellular amino acid catabolic process; GO:0009066 aspartate family amino acid metabolic process; GO:0009068…		GO:0003824 catalytic activity; GO:0008861 formate C-acetyltransferase activity; GO:0016407 acetyltransferase activity; GO:0016408 C-acyltransferase activity; GO:0016453 C-acetyltransferase activity; GO:0016740 transferase activity; GO:0016746 transferase activity, transferring acyl groups; GO:0016747 transferase activity, transferring acyl groups other than amino-acyl groups;	PF01228	Glycine radical	C	COG1882	Pyruvate-formate lyase
A0A0H2VE83	Uncharacterized protein OS=Staphylococcus epidermidis (strain ATCC 12228 / FDA PCI 1200) OX=176280 GN=SE_0095 PE=4 SV=1	SE_0095	1.294	0.000385211	Up	40.957	18.4	8	8	23	0.895	1.102	1.1	1.153	0.848	0.85	CytoplasmicMembrane	K01992	ABC-2.P; ABC-2 type transport system permease protein							V	COG0842	ABC-type multidrug transport system, permease component
D4FKG7	Uncharacterized protein OS=Staphylococcus epidermidis M23864:W2(grey) OX=525375 GN=HMPREF0794_1055 PE=4 SV=1	HMPREF0794_1055	1.28	0.0159357	Up	17.018	28	3	3	5	0.82	1.126	1.209	1.012	0.878	0.917	CytoplasmicMembrane	K10851	nreA; nitrogen regulatory protein A	map02020 Two-component system						T	COG2203	FOG: GAF domain
Q5HPB4	Peptide methionine sulfoxide reductase MsrB OS=Staphylococcus epidermidis (strain ATCC 35984 / RP62A) OX=176279 GN=msrB PE=3 SV=1	msrB	0.826	0.00714554	Down	59.059	24.1	15	9	48	1.086	0.927	0.855	0.96	1.142	1.091	Cytoplasmic	K07305	msrB; peptide-methionine (R)-S-oxide reductase [EC:1.8.4.12]							O	COG0229	Conserved domain frequently associated with peptide methionine sulfoxide reductase
Q8CU95	Serine--tRNA ligase OS=Staphylococcus epidermidis (strain ATCC 12228 / FDA PCI 1200) OX=176280 GN=serS PE=3 SV=1	serS	0.803	1.49953e-06	Down	48.896	64	24	17	153	1.12	0.897	0.888	0.891	1.108	1.106	Cytoplasmic	K01875	SARS, serS; seryl-tRNA synthetase [EC:6.1.1.11]	map00970 Aminoacyl-tRNA biosynthesis	GO:0006082 organic acid metabolic process; GO:0006139 nucleobase-containing compound metabolic process; GO:0006399 tRNA metabolic process; GO:0006412 translation; GO:0006418 tRNA aminoacylation for protein translation; GO:0006434 seryl-tRNA aminoacylation; GO:0006518 peptide metabolic process; GO:0006520 cellular amino acid metabolic process; GO:0006725 cellular aromatic compound metabolic proces…	GO:0005622 intracellular; GO:0005623 cell; GO:0005737 cytoplasm; GO:0005829 cytosol;	GO:0000287 magnesium ion binding; GO:0003824 catalytic activity; GO:0004812 aminoacyl-tRNA ligase activity; GO:0004828 serine-tRNA ligase activity; GO:0005488 binding; GO:0005515 protein binding; GO:0016874 ligase activity; GO:0016875 ligase activity, forming carbon-oxygen bonds; GO:0042802 identical protein binding; GO:0043167 ion binding; GO:0043169 cation binding; GO:0046872 metal ion binding;…	PF02403; PF00587	Seryl-tRNA synthetase N-terminal domain; tRNA synthetase class II core domain (G, H, P, S and T)	J	COG0172	Seryl-tRNA synthetase
O54222	EciB protein OS=Staphylococcus epidermidis OX=1282 GN=eciB PE=4 SV=1	eciB	1.363	0.0366273	Up	117.09	0.9	1	1	1	0.767	1.166	1.306	0.968	0.87	0.887	CytoplasmicMembrane	K20483	nisB, spaB, epiB; lantibiotic biosynthesis protein	map02020 Two-component system; map02024 Quorum sensing				PF14028	SpaB C-terminal domain
Q937Z2	Putative septation protein SpoVG OS=Staphylococcus epidermidis OX=1282 GN=spoVG PE=3 SV=1	spoVG	2.891	0.00558819	Up	11.293	67	7	1	44	0.419	1.628	1.719	1.004	0.555	0.531	Cytoplasmic	K06412	spoVG; stage V sporulation protein G		GO:0000003 reproduction; GO:0019954 asexual reproduction; GO:0030436 asexual sporulation; GO:0032502 developmental process; GO:0043934 sporulation;					D	COG2088	Uncharacterized protein, involved in the regulation of septum location
D7RLZ2	Translation elongation factor Tu (Fragment) OS=Staphylococcus epidermidis OX=1282 PE=3 SV=1	--	1.262	0.00876441	Up	24.094	88.5	19	1	305	0.842	1.066	1.209	1.062	0.899	0.904	Cytoplasmic	K02358	tuf, TUFM; elongation factor Tu	map04626 Plant-pathogen interaction		GO:0005622 intracellular; GO:0005623 cell; GO:0005737 cytoplasm;		PF00009; PF03144; PF03143	Elongation factor Tu GTP binding domain; Elongation factor Tu domain 2; Elongation factor Tu C-terminal domain	J	COG0050	GTPases - translation elongation factors
D4FMS3	Cof-like hydrolase OS=Staphylococcus epidermidis M23864:W2(grey) OX=525375 GN=HMPREF0794_1861 PE=4 SV=1	HMPREF0794_1861	1.297	0.0137102	Up	109.21	24.7	21	4	63	0.871	1.109	1.018	1.255	0.877	0.86	Cytoplasmic							PF08282	haloacid dehalogenase-like hydrolase	S	COG0561	Predicted hydrolases of the HAD superfamily
Q5HL40	Epoxyqueuosine reductase QueH OS=Staphylococcus epidermidis (strain ATCC 35984 / RP62A) OX=176279 GN=queH PE=3 SV=1	queH	0.793	0.00739827	Down	27.604	25.2	6	6	7	1.132	0.862	0.827	0.962	1.122	1.089	Cytoplasmic	K09765	queH; epoxyqueuosine reductase [EC:1.17.99.6]							C	COG1636	Uncharacterized protein conserved in bacteria
D4FL28	Uncharacterized protein OS=Staphylococcus epidermidis M23864:W2(grey) OX=525375 GN=HMPREF0794_1266 PE=4 SV=1	HMPREF0794_1266	0.788	0.0195573	Down	7.069	39	2	2	6	1.252	0.841	0.953	0.891	1.054	1.103	CytoplasmicMembrane
Q8CNC8	Urease accessory protein UreE OS=Staphylococcus epidermidis (strain ATCC 12228 / FDA PCI 1200) OX=176280 GN=ureE PE=3 SV=1	ureE	0.752	0.000132478	Down	17.497	62.7	9	9	45	1.108	0.877	0.857	0.856	1.177	1.157	Cytoplasmic	K03187	ureE; urease accessory protein			GO:0005622 intracellular; GO:0005623 cell; GO:0005737 cytoplasm;		PF02814; PF05194	UreE urease accessory protein, N-terminal domain; UreE urease accessory protein, C-terminal domain	O	COG2371	Urease accessory protein UreE
Q8CRM8	50S ribosomal protein L31 type B OS=Staphylococcus epidermidis (strain ATCC 12228 / FDA PCI 1200) OX=176280 GN=rpmE2 PE=3 SV=1	rpmE2	1.271	6.219e-05	Up	9.7787	69.4	5	5	62	0.857	1.118	1.103	1.077	0.858	0.879	Unknown	K02909	RP-L31, rpmE; large subunit ribosomal protein L31	map03010 Ribosome	GO:0006412 translation; GO:0006518 peptide metabolic process; GO:0006807 nitrogen compound metabolic process; GO:0006950 response to stress; GO:0007154 cell communication; GO:0008152 metabolic process; GO:0009058 biosynthetic process; GO:0009059 macromolecule biosynthetic process; GO:0009267 cellular response to starvation; GO:0009605 response to external stimulus; GO:0009987 cellular process; GO…	GO:0005622 intracellular; GO:0005623 cell; GO:0005737 cytoplasm; GO:0005829 cytosol; GO:0005840 ribosome; GO:0015934 large ribosomal subunit; GO:0022625 cytosolic large ribosomal subunit; GO:0022626 cytosolic ribosome; GO:0032991 protein-containing complex; GO:0043226 organelle; GO:0043228 non-membrane-bounded organelle; GO:0043229 intracellular organelle; GO:0043232 intracellular non-membrane-bo…	GO:0003735 structural constituent of ribosome; GO:0005198 structural molecule activity;			J	COG0254	Ribosomal protein L31
Q8CR03	Sulfate adenylyltransferase OS=Staphylococcus epidermidis (strain ATCC 12228 / FDA PCI 1200) OX=176280 GN=sat PE=3 SV=1	sat	2.335	1.66465e-05	Up	44.354	18.9	7	7	10	0.582	1.408	1.343	1.386	0.563	0.627	Cytoplasmic	K00958	sat, met3; sulfate adenylyltransferase [EC:2.7.7.4]	map00230 Purine metabolism; map00261 Monobactam biosynthesis; map00450 Selenocompound metabolism; map00920 Sulfur metabolism; map01100 Metabolic pathways; map01120 Microbial metabolism in diverse environments; map01130 Biosynthesis of antibiotics				PF14306; PF01747	PUA-like domain; ATP-sulfurylase	H	COG2046	ATP sulfurylase (sulfate adenylyltransferase)
Q8CRH6	50S ribosomal protein L18 OS=Staphylococcus epidermidis (strain ATCC 12228 / FDA PCI 1200) OX=176280 GN=rplR PE=3 SV=1	rplR	1.206	0.00118046	Up	13.295	55.8	8	1	53	0.908	1.058	1.077	1.14	0.907	0.901	Cytoplasmic	K02881	RP-L18, MRPL18, rplR; large subunit ribosomal protein L18	map03010 Ribosome	GO:0006412 translation; GO:0006518 peptide metabolic process; GO:0006807 nitrogen compound metabolic process; GO:0008152 metabolic process; GO:0009058 biosynthetic process; GO:0009059 macromolecule biosynthetic process; GO:0009987 cellular process; GO:0010467 gene expression; GO:0019538 protein metabolic process; GO:0034641 cellular nitrogen compound metabolic process; GO:0034645 cellular macromo…	GO:0005622 intracellular; GO:0005623 cell; GO:0005737 cytoplasm; GO:0005829 cytosol; GO:0005840 ribosome; GO:0015934 large ribosomal subunit; GO:0022625 cytosolic large ribosomal subunit; GO:0022626 cytosolic ribosome; GO:0032991 protein-containing complex; GO:0043226 organelle; GO:0043228 non-membrane-bounded organelle; GO:0043229 intracellular organelle; GO:0043232 intracellular non-membrane-bo…	GO:0003676 nucleic acid binding; GO:0003723 RNA binding; GO:0003735 structural constituent of ribosome; GO:0005198 structural molecule activity; GO:0005488 binding; GO:0008097 5S rRNA binding; GO:0019843 rRNA binding; GO:0097159 organic cyclic compound binding; GO:1901363 heterocyclic compound binding;			J	COG0256	Ribosomal protein L18
A0A509LR38	tRNA-specific adenosine deaminase OS=Staphylococcus epidermidis OX=1282 GN=tadA PE=3 SV=1	tadA	0.721	0.00349043	Down	71.212	5.4	4	3	4	1.219	0.831	0.843	0.867	1.059	1.247	Cytoplasmic	K11991	tadA; tRNA(adenine34) deaminase [EC:3.5.4.33]		GO:0002097 tRNA wobble base modification; GO:0002100 tRNA wobble adenosine to inosine editing; GO:0006139 nucleobase-containing compound metabolic process; GO:0006382 adenosine to inosine editing; GO:0006396 RNA processing; GO:0006399 tRNA metabolic process; GO:0006400 tRNA modification; GO:0006725 cellular aromatic compound metabolic process; GO:0006807 nitrogen compound metabolic process; GO:00…					FJ	COG0590	Cytosine/adenosine deaminases
O07471	DNA topoisomerase (ATP-hydrolyzing) (Fragment) OS=Staphylococcus epidermidis OX=1282 GN=gyrA PE=4 SV=1	gyrA	0.747	0.0250205	Down	14.524	47.7	6	1	14	1.216	0.867	0.744	0.986	1.133	1.126	Cytoplasmic	K02469	gyrA; DNA gyrase subunit A [EC:5.6.2.2]		GO:0006139 nucleobase-containing compound metabolic process; GO:0006259 DNA metabolic process; GO:0006265 DNA topological change; GO:0006725 cellular aromatic compound metabolic process; GO:0006807 nitrogen compound metabolic process; GO:0006996 organelle organization; GO:0008152 metabolic process; GO:0009987 cellular process; GO:0016043 cellular component organization; GO:0034641 cellular nitrog…	GO:0005618 cell wall; GO:0005623 cell; GO:0005886 plasma membrane; GO:0016020 membrane; GO:0030312 external encapsulating structure; GO:0071944 cell periphery;	GO:0000166 nucleotide binding; GO:0000287 magnesium ion binding; GO:0003824 catalytic activity; GO:0003916 DNA topoisomerase activity; GO:0003918 DNA topoisomerase type II (double strand cut, ATP-hydrolyzing) activity; GO:0005488 binding; GO:0005524 ATP binding; GO:0008094 DNA-dependent ATPase activity; GO:0008144 drug binding; GO:0016462 pyrophosphatase activity; GO:0016787 hydrolase activity; G…			L	COG0188	Type IIA topoisomerase (DNA gyrase/topo II, topoisomerase IV), A subunit
A0A2S1XWC1	Putative membrane protein OS=Staphylococcus epidermidis OX=1282 GN=pLF25_1 PE=4 SV=1	pLF25_1	1.718	0.00417092	Up	7.2707	20.6	1	1	4	0.716	1.155	1.124	0.973	0.626	0.551	CytoplasmicMembrane
A0A0H2VGR8	ABC transporter ecsA-like protein OS=Staphylococcus epidermidis (strain ATCC 12228 / FDA PCI 1200) OX=176280 GN=SE_0094 PE=4 SV=1	SE_0094	1.401	4.6374e-05	Up	27	75.2	17	17	71	0.802	1.126	1.176	1.155	0.836	0.829	CytoplasmicMembrane	K01990	ABC-2.A; ABC-2 type transport system ATP-binding protein					PF00005	ABC transporter	V	COG1131	ABC-type multidrug transport system, ATPase component
A0A7I0AKV9	50S ribosomal protein L18 OS=Staphylococcus epidermidis OX=1282 GN=rplR PE=3 SV=1	rplR	1.204	0.00227906	Up	13.294	55.8	8	1	54	0.9	1.11	1.111	1.05	0.878	0.938	Cytoplasmic	K02881	RP-L18, MRPL18, rplR; large subunit ribosomal protein L18	map03010 Ribosome	GO:0006412 translation; GO:0006518 peptide metabolic process; GO:0006807 nitrogen compound metabolic process; GO:0008152 metabolic process; GO:0009058 biosynthetic process; GO:0009059 macromolecule biosynthetic process; GO:0009987 cellular process; GO:0010467 gene expression; GO:0019538 protein metabolic process; GO:0034641 cellular nitrogen compound metabolic process; GO:0034645 cellular macromo…	GO:0005622 intracellular; GO:0005623 cell; GO:0005737 cytoplasm; GO:0005829 cytosol; GO:0005840 ribosome; GO:0015934 large ribosomal subunit; GO:0022625 cytosolic large ribosomal subunit; GO:0022626 cytosolic ribosome; GO:0032991 protein-containing complex; GO:0043226 organelle; GO:0043228 non-membrane-bounded organelle; GO:0043229 intracellular organelle; GO:0043232 intracellular non-membrane-bo…	GO:0003676 nucleic acid binding; GO:0003723 RNA binding; GO:0003735 structural constituent of ribosome; GO:0005198 structural molecule activity; GO:0005488 binding; GO:0008097 5S rRNA binding; GO:0019843 rRNA binding; GO:0097159 organic cyclic compound binding; GO:1901363 heterocyclic compound binding;			J	COG0256	Ribosomal protein L18
Q5HLA7	Aldehyde dehydrogenase family protein OS=Staphylococcus epidermidis (strain ATCC 35984 / RP62A) OX=176279 GN=SERP2080 PE=3 SV=1	SERP2080	1.789	4.49522e-05	Up	52.97	48.4	14	2	20	0.685	1.287	1.291	1.222	0.696	0.743	Cytoplasmic	K07248	aldA; lactaldehyde dehydrogenase / glycolaldehyde dehydrogenase [EC:1.2.1.22 1.2.1.21]	map00620 Pyruvate metabolism; map00630 Glyoxylate and dicarboxylate metabolism; map01100 Metabolic pathways; map01120 Microbial metabolism in diverse environments						C	COG1012	NAD-dependent aldehyde dehydrogenases
Q8CSV0	30S ribosomal protein S16 OS=Staphylococcus epidermidis (strain ATCC 12228 / FDA PCI 1200) OX=176280 GN=rpsP PE=3 SV=1	rpsP	1.212	3.10556e-05	Up	10.36	57.1	6	6	44	0.88	1.055	1.088	1.066	0.885	0.883	Cytoplasmic	K02959	RP-S16, MRPS16, rpsP; small subunit ribosomal protein S16	map03010 Ribosome	GO:0000028 ribosomal small subunit assembly; GO:0006139 nucleobase-containing compound metabolic process; GO:0006259 DNA metabolic process; GO:0006412 translation; GO:0006518 peptide metabolic process; GO:0006725 cellular aromatic compound metabolic process; GO:0006807 nitrogen compound metabolic process; GO:0006996 organelle organization; GO:0008152 metabolic process; GO:0009058 biosynthetic pro…	GO:0005622 intracellular; GO:0005623 cell; GO:0005737 cytoplasm; GO:0005829 cytosol; GO:0005840 ribosome; GO:0015935 small ribosomal subunit; GO:0022626 cytosolic ribosome; GO:0022627 cytosolic small ribosomal subunit; GO:0032991 protein-containing complex; GO:0043226 organelle; GO:0043228 non-membrane-bounded organelle; GO:0043229 intracellular organelle; GO:0043232 intracellular non-membrane-bo…	GO:0000217 DNA secondary structure binding; GO:0000400 four-way junction DNA binding; GO:0003676 nucleic acid binding; GO:0003677 DNA binding; GO:0003735 structural constituent of ribosome; GO:0003824 catalytic activity; GO:0004518 nuclease activity; GO:0004519 endonuclease activity; GO:0004520 endodeoxyribonuclease activity; GO:0004536 deoxyribonuclease activity; GO:0005198 structural molecule a…			J	COG0228	Ribosomal protein S16
Q5HS21	Triacylglycerol lipase OS=Staphylococcus epidermidis (strain ATCC 35984 / RP62A) OX=176279 GN=SERP0018 PE=4 SV=1	SERP0018	0.773	0.000334399	Down	164.11	9.8	13	11	21	1.172	0.94	0.883	0.876	1.162	1.158	Extracellular	K01046	lip, TGL2; triacylglycerol lipase [EC:3.1.1.3]	map00561 Glycerolipid metabolism; map01100 Metabolic pathways						D	COG1075	Predicted acetyltransferases and hydrolases with the alpha/beta hydrolase fold
Q5HKM0	Dihydrolipoamide acetyltransferase component of pyruvate dehydrogenase complex OS=Staphylococcus epidermidis (strain ATCC 35984 / RP62A) OX=176279 GN=SERP2324 PE=3 SV=1	SERP2324	0.798	7.27534e-05	Down	46.218	36.9	13	13	21	1.127	0.9	0.874	0.902	1.098	1.127	Cytoplasmic	K00627	DLAT, aceF, pdhC; pyruvate dehydrogenase E2 component (dihydrolipoamide acetyltransferase) [EC:2.3.1.12]	map00010 Glycolysis / Gluconeogenesis; map00020 Citrate cycle (TCA cycle); map00620 Pyruvate metabolism; map01100 Metabolic pathways; map01110 Biosynthesis of secondary metabolites; map01120 Microbial metabolism in diverse environments; map01130 Biosynthesis of antibiotics; map01200 Carbon metabolism				PF00364; PF00198	Biotin-requiring enzyme; 2-oxoacid dehydrogenases acyltransferase (catalytic domain)	C	COG0508	Pyruvate/2-oxoglutarate dehydrogenase complex, dihydrolipoamide acyltransferase (E2) component, and related enzymes
Q5HN25	Uncharacterized protein OS=Staphylococcus epidermidis (strain ATCC 35984 / RP62A) OX=176279 GN=SERP1447 PE=4 SV=1	SERP1447	1.203	0.000270605	Up	6.9431	66.1	4	4	6	0.896	1.122	1.09	1.072	0.915	0.918	Cytoplasmic
Q5HM90	ATP-grasp domain-containing protein OS=Staphylococcus epidermidis (strain ATCC 35984 / RP62A) OX=176279 GN=SERP1739 PE=4 SV=1	SERP1739	1.288	0.000540894	Up	121.73	32.6	29	1	75	0.89	1.086	1.119	1.162	0.879	0.845	Unknown									M	COG1181	D-alanine-D-alanine ligase and related ATP-grasp enzymes
Q5HEG2	Accessory gene regulator A OS=Staphylococcus aureus (strain COL) OX=93062 GN=agrA PE=1 SV=1	agrA	2.51	0.000675552	Up	27.906	23.5	6	1	12	0.601	1.387	1.602	1.218	0.574	0.501	Cytoplasmic	K07707	agrA, blpR, fsrA; two-component system, LytTR family, response regulator AgrA	map02020 Two-component system; map02024 Quorum sensing				PF00072; PF04397	Response regulator receiver domain; LytTr DNA-binding domain	K	COG3279	Response regulator of the LytR/AlgR family
A0A7I0AWZ7	Histidine kinase OS=Staphylococcus epidermidis OX=1282 GN=E1M98_12110 PE=4 SV=1	E1M98_12110	0.803	0.000740224	Down	42.43	2.2	1	1	1	1.097	0.893	0.932	0.873	1.149	1.113	CytoplasmicMembrane	K20487	nisK, spaK; two-component system, OmpR family, lantibiotic biosynthesis sensor histidine kinase NisK/SpaK [EC:2.7.13.3]	map02020 Two-component system; map02024 Quorum sensing				PF02518	Histidine kinase-, DNA gyrase B-, and HSP90-like ATPase	T	COG2205	Osmosensitive K+ channel histidine kinase
Q5HFB6	50S ribosomal protein L21 OS=Staphylococcus aureus (strain COL) OX=93062 GN=rplU PE=3 SV=1	rplU	1.238	0.010163	Up	11.333	36.3	3	1	13	0.839	1.102	1.169	1.039	0.935	0.9	Unknown	K02888	RP-L21, MRPL21, rplU; large subunit ribosomal protein L21	map03010 Ribosome	GO:0006412 translation; GO:0006518 peptide metabolic process; GO:0006807 nitrogen compound metabolic process; GO:0008152 metabolic process; GO:0009058 biosynthetic process; GO:0009059 macromolecule biosynthetic process; GO:0009987 cellular process; GO:0010467 gene expression; GO:0019538 protein metabolic process; GO:0034641 cellular nitrogen compound metabolic process; GO:0034645 cellular macromo…	GO:0005622 intracellular; GO:0005623 cell; GO:0005737 cytoplasm; GO:0005829 cytosol; GO:0005840 ribosome; GO:0005886 plasma membrane; GO:0015934 large ribosomal subunit; GO:0016020 membrane; GO:0022625 cytosolic large ribosomal subunit; GO:0022626 cytosolic ribosome; GO:0032991 protein-containing complex; GO:0043226 organelle; GO:0043228 non-membrane-bounded organelle; GO:0043229 intracellular or…	GO:0003735 structural constituent of ribosome; GO:0005198 structural molecule activity;			J	COG0261	Ribosomal protein L21
Q8CPQ1	Bifunctional autolysin OS=Staphylococcus epidermidis (strain ATCC 12228 / FDA PCI 1200) OX=176280 GN=atl PE=3 SV=1	atl	0.307	0.00161868	Down	148.28	67.8	71	1	360	1.757	0.529	0.356	0.575	1.537	1.459	Extracellular	K13714	atl; bifunctional autolysin [EC:3.5.1.28 3.2.1.96]					PF13457; PF01832	SH3-like domain; Mannosyl-glycoprotein endo-beta-N-acetylglucosaminidase	M	COG5632	N-acetylmuramoyl-L-alanine amidase
Q8CP17	Chaperone protein DnaK OS=Staphylococcus epidermidis (strain ATCC 12228 / FDA PCI 1200) OX=176280 GN=dnaK PE=3 SV=1	dnaK	1.229	8.27201e-06	Up	66.159	84.6	54	32	303	0.888	1.084	1.107	1.101	0.893	0.898	Cytoplasmic	K04043	dnaK, HSPA9; molecular chaperone DnaK	map03018 RNA degradation; map05152 Tuberculosis	GO:0051704 multi-organism process; GO:0098630 aggregation of unicellular organisms; GO:0098743 cell aggregation;	GO:0005623 cell; GO:0009986 cell surface;	GO:0005488 binding; GO:0030246 carbohydrate binding; GO:0030247 polysaccharide binding; GO:2001065 mannan binding;			O	COG0443	Molecular chaperone
A0A7I0BVE8	Sensor histidine kinase OS=Staphylococcus epidermidis OX=1282 GN=ATM22_02335 PE=4 SV=1	ATM22_02335	1.882	0.00450593	Up	39.844	57	15	1	25	0.79	1.348	1.365	1.149	0.568	0.694	CytoplasmicMembrane	K07683	nreB; two-component system, NarL family, sensor histidine kinase NreB [EC:2.7.13.3]	map02020 Two-component system				PF07730; PF02518	Histidine kinase; Histidine kinase-, DNA gyrase B-, and HSP90-like ATPase	F	COG4585	Signal transduction histidine kinase
A0A7H5CB22	UDP-N-acetylmuramoyl-L-alanyl-D-glutamate--L-lysine ligase OS=Staphylococcus epidermidis OX=1282 GN=murE PE=3 SV=1	murE	1.281	0.0410206	Up	54.289	51.8	18	1	43	0.86	0.985	1.17	1.199	0.796	0.963	Cytoplasmic	K05362	murE; UDP-N-acetylmuramoyl-L-alanyl-D-glutamate-L-lysine ligase [EC:6.3.2.7]	map00550 Peptidoglycan biosynthesis; map01100 Metabolic pathways				PF01225; PF08245; PF02875	Mur ligase family, catalytic domain; Mur ligase middle domain; Mur ligase family, glutamate ligase domain	M	COG0769	UDP-N-acetylmuramyl tripeptide synthase
Q8CQP6	30S ribosomal protein S18 OS=Staphylococcus epidermidis (strain ATCC 12228 / FDA PCI 1200) OX=176280 GN=rpsR PE=3 SV=1	rpsR	0.832	0.0157802	Down	9.2938	36.2	4	4	18	1.11	0.926	0.834	0.968	1.106	1.064	Cytoplasmic	K02963	RP-S18, MRPS18, rpsR; small subunit ribosomal protein S18	map03010 Ribosome	GO:0006412 translation; GO:0006518 peptide metabolic process; GO:0006807 nitrogen compound metabolic process; GO:0008152 metabolic process; GO:0009058 biosynthetic process; GO:0009059 macromolecule biosynthetic process; GO:0009987 cellular process; GO:0010467 gene expression; GO:0019538 protein metabolic process; GO:0034641 cellular nitrogen compound metabolic process; GO:0034645 cellular macromo…	GO:0005618 cell wall; GO:0005622 intracellular; GO:0005623 cell; GO:0005737 cytoplasm; GO:0005829 cytosol; GO:0005840 ribosome; GO:0005886 plasma membrane; GO:0015935 small ribosomal subunit; GO:0016020 membrane; GO:0022626 cytosolic ribosome; GO:0022627 cytosolic small ribosomal subunit; GO:0030312 external encapsulating structure; GO:0032991 protein-containing complex; GO:0043226 organelle; GO:…	GO:0003735 structural constituent of ribosome; GO:0005198 structural molecule activity;			J	COG0238	Ribosomal protein S18
A0A5E9MEV2	Homoserine dehydrogenase OS=Staphylococcus epidermidis OX=1282 GN=CP553_05680 PE=3 SV=1	CP553_05680	1.206	0.00159778	Up	46.923	12.4	3	3	3	0.871	1.074	1.078	1.123	0.932	0.913	Unknown	K00003	hom; homoserine dehydrogenase [EC:1.1.1.3]	map00260 Glycine, serine and threonine metabolism; map00270 Cysteine and methionine metabolism; map00300 Lysine biosynthesis; map01100 Metabolic pathways; map01110 Biosynthesis of secondary metabolites; map01120 Microbial metabolism in diverse environments; map01130 Biosynthesis of antibiotics; map01230 Biosynthesis of amino acids	GO:0006082 organic acid metabolic process; GO:0006520 cellular amino acid metabolic process; GO:0006566 threonine metabolic process; GO:0006807 nitrogen compound metabolic process; GO:0008152 metabolic process; GO:0008652 cellular amino acid biosynthetic process; GO:0009058 biosynthetic process; GO:0009066 aspartate family amino acid metabolic process; GO:0009067 aspartate family amino acid biosy…	GO:0005618 cell wall; GO:0005623 cell; GO:0005886 plasma membrane; GO:0016020 membrane; GO:0030312 external encapsulating structure; GO:0071944 cell periphery;	GO:0003824 catalytic activity; GO:0004412 homoserine dehydrogenase activity; GO:0016491 oxidoreductase activity; GO:0016614 oxidoreductase activity, acting on CH-OH group of donors; GO:0016616 oxidoreductase activity, acting on the CH-OH group of donors, NAD or NADP as acceptor;	PF03447; PF00742	Homoserine dehydrogenase, NAD binding domain; Homoserine dehydrogenase	E	COG0460	Homoserine dehydrogenase
D4FNT3	Protein DltD OS=Staphylococcus epidermidis M23864:W2(grey) OX=525375 GN=dltD PE=3 SV=1	dltD	0.58	0.0446667	Down	47.452	37.6	13	1	32	1.493	0.695	0.555	1.001	1.313	1.078	Unknown	K03740	dltD; D-alanine transfer protein	map01503 Cationic antimicrobial peptide (CAMP) resistance; map02020 Two-component system; map05150 Staphylococcus aureus infection						M	COG3966	Protein involved in D-alanine esterification of lipoteichoic acid and wall teichoic acid (D-alanine transfer protein)
Q8CRH8	50S ribosomal protein L30 OS=Staphylococcus epidermidis (strain ATCC 12228 / FDA PCI 1200) OX=176280 GN=rpmD PE=3 SV=1	rpmD	1.213	0.00203868	Up	6.5816	71.2	6	6	71	0.848	1.072	1.102	1.064	0.898	0.923	Cytoplasmic	K02907	RP-L30, MRPL30, rpmD; large subunit ribosomal protein L30	map03010 Ribosome	GO:0000027 ribosomal large subunit assembly; GO:0006412 translation; GO:0006518 peptide metabolic process; GO:0006807 nitrogen compound metabolic process; GO:0006996 organelle organization; GO:0008152 metabolic process; GO:0009058 biosynthetic process; GO:0009059 macromolecule biosynthetic process; GO:0009987 cellular process; GO:0010467 gene expression; GO:0016043 cellular component organization…	GO:0005622 intracellular; GO:0005623 cell; GO:0005737 cytoplasm; GO:0005829 cytosol; GO:0005840 ribosome; GO:0015934 large ribosomal subunit; GO:0022625 cytosolic large ribosomal subunit; GO:0022626 cytosolic ribosome; GO:0032991 protein-containing complex; GO:0043226 organelle; GO:0043228 non-membrane-bounded organelle; GO:0043229 intracellular organelle; GO:0043232 intracellular non-membrane-bo…	GO:0003735 structural constituent of ribosome; GO:0005198 structural molecule activity;	PF00327	Ribosomal protein L30p/L7e	J	COG1841	Ribosomal protein L30/L7E
Q5HS02	Trans-sulfuration enzyme family protein OS=Staphylococcus epidermidis (strain ATCC 35984 / RP62A) OX=176279 GN=SERP0037 PE=3 SV=1	SERP0037	1.41	0.000867777	Up	41.345	23.7	7	7	14	0.858	1.145	1.109	1.24	0.808	0.812	Cytoplasmic	K01739	metB; cystathionine gamma-synthase [EC:2.5.1.48]	map00270 Cysteine and methionine metabolism; map00450 Selenocompound metabolism; map00920 Sulfur metabolism; map01100 Metabolic pathways; map01110 Biosynthesis of secondary metabolites; map01130 Biosynthesis of antibiotics; map01230 Biosynthesis of amino acids			GO:0003824 catalytic activity; GO:0003962 cystathionine gamma-synthase activity; GO:0004123 cystathionine gamma-lyase activity; GO:0016740 transferase activity; GO:0016765 transferase activity, transferring alkyl or aryl (other than methyl) groups; GO:0016829 lyase activity; GO:0016846 carbon-sulfur lyase activity;	PF01053	Cys/Met metabolism PLP-dependent enzyme	E	COG0626	Cystathionine beta-lyases/cystathionine gamma-synthases
Q8CPJ6	Dihydroorotase OS=Staphylococcus epidermidis (strain ATCC 12228 / FDA PCI 1200) OX=176280 GN=pyrC PE=3 SV=1	pyrC	1.391	0.0282359	Up	46.765	54.4	21	2	59	0.856	1.23	1.325	0.972	0.811	0.869	Cytoplasmic	K01465	URA4, pyrC; dihydroorotase [EC:3.5.2.3]	map00240 Pyrimidine metabolism; map01100 Metabolic pathways	GO:0006139 nucleobase-containing compound metabolic process; GO:0006144 purine nucleobase metabolic process; GO:0006145 purine nucleobase catabolic process; GO:0006220 pyrimidine nucleotide metabolic process; GO:0006221 pyrimidine nucleotide biosynthetic process; GO:0006725 cellular aromatic compound metabolic process; GO:0006753 nucleoside phosphate metabolic process; GO:0006793 phosphorus metab…	GO:0005622 intracellular; GO:0005623 cell; GO:0005737 cytoplasm;	GO:0003824 catalytic activity; GO:0004038 allantoinase activity; GO:0004151 dihydroorotase activity; GO:0016787 hydrolase activity; GO:0016810 hydrolase activity, acting on carbon-nitrogen (but not peptide) bonds; GO:0016812 hydrolase activity, acting on carbon-nitrogen (but not peptide) bonds, in cyclic amides;	PF01979	Amidohydrolase family	F	COG0044	Dihydroorotase and related cyclic amidohydrolases
Q5HLT4	Uncharacterized protein OS=Staphylococcus epidermidis (strain ATCC 35984 / RP62A) OX=176279 GN=SERP1898 PE=4 SV=1	SERP1898	1.304	7.31965e-05	Up	72.396	26.1	16	11	26	0.841	1.144	1.102	1.121	0.871	0.87	Cytoplasmic	K09963	K09963; uncharacterized protein							S	COG3589	Uncharacterized conserved protein
A0A7I0AVD9	NDxxF motif lipoprotein OS=Staphylococcus epidermidis OX=1282 GN=ATM22_11555 PE=4 SV=1	ATM22_11555	1.291	0.0194602	Up	23.778	52.2	12	3	36	0.792	1.17	1.147	0.977	0.878	0.882	Unknown
A0A7T9WSD6	MetQ/NlpA family ABC transporter substrate-binding protein OS=Staphylococcus epidermidis OX=1282 GN=I6I40_10900 PE=4 SV=1	I6I40_10900	1.531	0.0152971	Up	30.156	59.3	16	3	45	0.697	1.18	1.382	1.032	0.793	0.858	CytoplasmicMembrane	K02073	metQ; D-methionine transport system substrate-binding protein	map02010 ABC transporters						M	COG1464	ABC-type metal ion transport system, periplasmic component/surface antigen
Q8CS48	Tyrosine--tRNA ligase OS=Staphylococcus epidermidis (strain ATCC 12228 / FDA PCI 1200) OX=176280 GN=tyrS PE=3 SV=1	tyrS	1.408	0.0276782	Up	47.642	63.4	23	1	71	0.76	1.172	1.327	0.983	0.815	0.898	Cytoplasmic	K01866	YARS, tyrS; tyrosyl-tRNA synthetase [EC:6.1.1.1]	map00970 Aminoacyl-tRNA biosynthesis	GO:0006082 organic acid metabolic process; GO:0006139 nucleobase-containing compound metabolic process; GO:0006399 tRNA metabolic process; GO:0006412 translation; GO:0006418 tRNA aminoacylation for protein translation; GO:0006437 tyrosyl-tRNA aminoacylation; GO:0006518 peptide metabolic process; GO:0006520 cellular amino acid metabolic process; GO:0006725 cellular aromatic compound metabolic proc…	GO:0005622 intracellular; GO:0005623 cell; GO:0005737 cytoplasm; GO:0005829 cytosol;	GO:0003824 catalytic activity; GO:0004812 aminoacyl-tRNA ligase activity; GO:0004831 tyrosine-tRNA ligase activity; GO:0016874 ligase activity; GO:0016875 ligase activity, forming carbon-oxygen bonds; GO:0140098 catalytic activity, acting on RNA; GO:0140101 catalytic activity, acting on a tRNA;	PF01479	S4 domain	J	COG0162	Tyrosyl-tRNA synthetase
Q5HQS8	Uncharacterized protein OS=Staphylococcus epidermidis (strain ATCC 35984 / RP62A) OX=176279 GN=SERP0469 PE=4 SV=1	SERP0469	1.61	0.00326416	Up	28.609	14.5	3	3	3	0.761	1.274	1.071	1.325	0.808	0.71	Unknown							PF05908	Protein of unknown function (DUF867)	S	COG4195	Phage-related replication protein
D2JC68	Beta-lactamase regulatory sensor-transducer BlaR1 OS=Staphylococcus epidermidis OX=1282 GN=blaR1 PE=3 SV=1	blaR1	0.576	0.000103289	Down	69.268	25	16	6	31	1.331	0.713	0.792	0.726	1.273	1.27	CytoplasmicMembrane	K02172	blaR1; bla regulator protein blaR1	map01501 beta-Lactam resistance				PF05569; PF00905	BlaR1 peptidase M56; Penicillin binding protein transpeptidase domain	KTV	COG4219	Antirepressor regulating drug resistance, predicted signal transduction N-terminal membrane component
A0A7G9EGF5	DUF4467 domain-containing protein OS=Staphylococcus epidermidis OX=1282 GN=ATM22_02255 PE=4 SV=1	ATM22_02255	0.779	0.00767882	Down	14.08	41.2	5	5	14	1.118	0.874	0.801	0.948	1.154	1.097	Unknown
A0A7I0ANG2	Sulfite reductase [NADPH] hemoprotein beta-component OS=Staphylococcus epidermidis OX=1282 GN=cysI PE=3 SV=1	cysI	1.216	0.026769	Up	65.354	43.5	18	1	28	0.818	1.108	1.149	1.027	0.947	0.936	Cytoplasmic	K00381	cysI; sulfite reductase (NADPH) hemoprotein beta-component [EC:1.8.1.2]	map00920 Sulfur metabolism; map01100 Metabolic pathways; map01120 Microbial metabolism in diverse environments	GO:0006790 sulfur compound metabolic process; GO:0008152 metabolic process; GO:0009987 cellular process; GO:0019419 sulfate reduction; GO:0044237 cellular metabolic process; GO:0055114 oxidation-reduction process;	GO:0005622 intracellular; GO:0005623 cell; GO:0009337 sulfite reductase complex (NADPH); GO:0032991 protein-containing complex;	GO:0003824 catalytic activity; GO:0004783 sulfite reductase (NADPH) activity; GO:0005488 binding; GO:0016002 sulfite reductase activity; GO:0016491 oxidoreductase activity; GO:0016651 oxidoreductase activity, acting on NAD(P)H; GO:0016667 oxidoreductase activity, acting on a sulfur group of donors; GO:0016668 oxidoreductase activity, acting on a sulfur group of donors, NAD(P) as acceptor; GO:0016…			H	COG0155	Sulfite reductase, beta subunit (hemoprotein)
Q5HIB4	Serine-aspartate repeat-containing protein C OS=Staphylococcus aureus (strain COL) OX=93062 GN=sdrC PE=3 SV=1	sdrC	0.659	0.00104052	Down	102.91	1.3	1	1	2	1.201	0.873	0.789	0.755	1.185	1.279	Cellwall	K14194	sdrC_D_E; serine-aspartate repeat-containing protein C/D/E	map05150 Staphylococcus aureus infection	GO:0051704 multi-organism process; GO:0098630 aggregation of unicellular organisms; GO:0098743 cell aggregation;		GO:0001968 fibronectin binding; GO:0005488 binding; GO:0005515 protein binding; GO:0044877 protein-containing complex binding; GO:0070051 fibrinogen binding;	PF10425	C-terminus of bacterial fibrinogen-binding adhesin	M	COG4932	Predicted outer membrane protein
Q8CTA8	UPF0337 protein SE_0604 OS=Staphylococcus epidermidis (strain ATCC 12228 / FDA PCI 1200) OX=176280 GN=SE_0604 PE=3 SV=1	SE_0604	1.364	7.41495e-05	Up	6.8114	81	14	14	133	0.833	1.147	1.181	1.11	0.842	0.846	Extracellular							PF05532	CsbD-like	S	COG3237	Uncharacterized protein conserved in bacteria
A0A7I0AQM9	Alpha-amylase OS=Staphylococcus epidermidis OX=1282 GN=CP553_02820 PE=3 SV=1	CP553_02820	0.807	1.60642e-05	Down	64.311	52.8	27	27	101	1.11	0.904	0.884	0.909	1.116	1.115	Cytoplasmic	K01187	malZ; alpha-glucosidase [EC:3.2.1.20]	map00052 Galactose metabolism; map00500 Starch and sucrose metabolism; map01100 Metabolic pathways				PF00128	Alpha amylase, catalytic domain	G	COG0366	Glycosidases
H9BJI9	Carbamate kinase OS=Staphylococcus epidermidis OX=1282 GN=arcC PE=3 SV=1	arcC	0.58	2.54904e-06	Down	33.545	47.7	11	11	35	1.301	0.759	0.742	0.73	1.265	1.28	Cytoplasmic	K00926	arcC; carbamate kinase [EC:2.7.2.2]	map00220 Arginine biosynthesis; map00230 Purine metabolism; map00910 Nitrogen metabolism; map01100 Metabolic pathways; map01120 Microbial metabolism in diverse environments; map01200 Carbon metabolism	GO:0006082 organic acid metabolic process; GO:0006520 cellular amino acid metabolic process; GO:0006525 arginine metabolic process; GO:0006527 arginine catabolic process; GO:0006793 phosphorus metabolic process; GO:0006796 phosphate-containing compound metabolic process; GO:0006807 nitrogen compound metabolic process; GO:0008152 metabolic process; GO:0009056 catabolic process; GO:0009063 cellular…	GO:0005622 intracellular; GO:0005623 cell; GO:0005737 cytoplasm; GO:0005829 cytosol;	GO:0003824 catalytic activity; GO:0008804 carbamate kinase activity; GO:0016301 kinase activity; GO:0016740 transferase activity; GO:0016772 transferase activity, transferring phosphorus-containing groups; GO:0016774 phosphotransferase activity, carboxyl group as acceptor;			E	COG0549	Carbamate kinase
D4FNP0	Uncharacterized protein OS=Staphylococcus epidermidis M23864:W2(grey) OX=525375 GN=HMPREF0794_2178 PE=4 SV=1	HMPREF0794_2178	0.744	0.0406908	Down	66.241	39.3	18	2	104	1.182	0.851	0.723	1.019	1.197	1.105	Unknown
A0A5R1C8C8	Uncharacterized protein OS=Staphylococcus epidermidis OX=1282 GN=CP553_06845 PE=4 SV=1	CP553_06845	1.347	2.55935e-05	Up	12.426	53.4	5	5	11	0.857	1.154	1.12	1.152	0.855	0.832	Unknown
U6C146	Ornithine carbamoyltransferase OS=Staphylococcus epidermidis OX=1282 GN=arcB PE=3 SV=1	arcB	0.676	1.1284e-05	Down	37.512	54.8	14	12	65	1.209	0.828	0.8	0.822	1.228	1.186	Cytoplasmic	K00611	OTC, argF, argI; ornithine carbamoyltransferase [EC:2.1.3.3]	map00220 Arginine biosynthesis; map01100 Metabolic pathways; map01110 Biosynthesis of secondary metabolites; map01130 Biosynthesis of antibiotics; map01230 Biosynthesis of amino acids	GO:0000050 urea cycle; GO:0006082 organic acid metabolic process; GO:0006520 cellular amino acid metabolic process; GO:0006525 arginine metabolic process; GO:0006526 arginine biosynthetic process; GO:0006591 ornithine metabolic process; GO:0006807 nitrogen compound metabolic process; GO:0006950 response to stress; GO:0006974 cellular response to DNA damage stimulus; GO:0008152 metabolic process; …	GO:0005622 intracellular; GO:0005623 cell; GO:0005737 cytoplasm;	GO:0003824 catalytic activity; GO:0004585 ornithine carbamoyltransferase activity; GO:0016740 transferase activity; GO:0016741 transferase activity, transferring one-carbon groups; GO:0016743 carboxyl- or carbamoyltransferase activity;	PF02729; PF00185	Aspartate/ornithine carbamoyltransferase, carbamoyl-P binding domain; Aspartate/ornithine carbamoyltransferase, Asp/Orn binding domain	E	COG0078	Ornithine carbamoyltransferase
Q5HRB7	Uncharacterized protein OS=Staphylococcus epidermidis (strain ATCC 35984 / RP62A) OX=176279 GN=SERP0276 PE=4 SV=1	SERP0276	0.638	0.00205782	Down	32.398	4	1	1	1	1.347	0.855	0.726	0.793	1.18	1.196	CytoplasmicMembrane	K09936	TC.BAT2; bacterial/archaeal transporter family-2 protein	map02024 Quorum sensing		GO:0005623 cell; GO:0005886 plasma membrane; GO:0016020 membrane; GO:0071944 cell periphery;				S	COG3238	Uncharacterized protein conserved in bacteria
Q5HR75	LysM domain protein OS=Staphylococcus epidermidis (strain ATCC 35984 / RP62A) OX=176279 GN=SERP0318 PE=4 SV=1	SERP0318	0.388	7.48993e-06	Down	28.229	42.5	6	6	14	1.526	0.549	0.563	0.595	1.451	1.422	Cellwall							PF01476; PF05257	LysM domain; CHAP domain	M	COG3942	Surface antigen
A0A7G9EDQ7	Prephenate dehydrogenase OS=Staphylococcus epidermidis OX=1282 GN=ATM22_06930 PE=3 SV=1	ATM22_06930	1.735	0.0116455	Up	40.71	5	1	1	1	0.649	1.243	1.472	1.04	0.688	0.827	Cytoplasmic	K04517	tyrA2; prephenate dehydrogenase [EC:1.3.1.12]	map00400 Phenylalanine, tyrosine and tryptophan biosynthesis; map00401 Novobiocin biosynthesis; map01100 Metabolic pathways; map01110 Biosynthesis of secondary metabolites; map01130 Biosynthesis of antibiotics; map01230 Biosynthesis of amino acids	GO:0006082 organic acid metabolic process; GO:0006520 cellular amino acid metabolic process; GO:0006570 tyrosine metabolic process; GO:0006571 tyrosine biosynthetic process; GO:0006725 cellular aromatic compound metabolic process; GO:0006807 nitrogen compound metabolic process; GO:0008152 metabolic process; GO:0008652 cellular amino acid biosynthetic process; GO:0009058 biosynthetic process; GO:0…		GO:0000166 nucleotide binding; GO:0003824 catalytic activity; GO:0005488 binding; GO:0008977 prephenate dehydrogenase (NAD+) activity; GO:0016491 oxidoreductase activity; GO:0016627 oxidoreductase activity, acting on the CH-CH group of donors; GO:0016628 oxidoreductase activity, acting on the CH-CH group of donors, NAD or NADP as acceptor; GO:0036094 small molecule binding; GO:0043167 ion binding…	PF01842	ACT domain	E	COG0287	Prephenate dehydrogenase
A0A0H2WY85	DNA polymerase III subunit gamma/tau OS=Staphylococcus aureus (strain COL) OX=93062 GN=dnaX PE=3 SV=1	dnaX	0.708	0.0182507	Down	63.498	9.4	5	2	5	1.254	0.828	0.728	0.968	1.207	1.102	Cytoplasmic	K02343	dnaX; DNA polymerase III subunit gamma/tau [EC:2.7.7.7]	map03030 DNA replication; map03430 Mismatch repair; map03440 Homologous recombination	GO:0006139 nucleobase-containing compound metabolic process; GO:0006259 DNA metabolic process; GO:0006260 DNA replication; GO:0006261 DNA-dependent DNA replication; GO:0006725 cellular aromatic compound metabolic process; GO:0006807 nitrogen compound metabolic process; GO:0008152 metabolic process; GO:0009058 biosynthetic process; GO:0009059 macromolecule biosynthetic process; GO:0009987 cellular…			PF13177	DNA polymerase III, delta subunit	L	COG2812	DNA polymerase III, gamma/tau subunits
A0A0E1VDB0	LysM domain protein OS=Staphylococcus epidermidis W23144 OX=525376 GN=sle1 PE=4 SV=1	sle1	0.448	1.22291e-05	Down	77.685	43.2	22	14	137	1.398	0.663	0.624	0.598	1.42	1.394	Cellwall	K22409	sle1; N-acetylmuramoyl-L-alanine amidase [EC:3.5.1.28]					PF01476; PF05257	LysM domain; CHAP domain	M	COG3942	Surface antigen
Q5HQ77	Uncharacterized protein OS=Staphylococcus epidermidis (strain ATCC 35984 / RP62A) OX=176279 GN=SERP0679 PE=4 SV=1	SERP0679	1.904	0.00402075	Up	24.252	51.4	17	1	59	0.702	1.179	1.462	1.235	0.57	0.764	Unknown									L	COG0497	ATPase involved in DNA repair
U6C447	Arginine deiminase OS=Staphylococcus epidermidis OX=1282 GN=arcA PE=3 SV=1	arcA	0.633	4.1618e-06	Down	47.27	77.4	34	26	115	1.264	0.795	0.786	0.776	1.216	1.243	Cytoplasmic	K01478	arcA; arginine deiminase [EC:3.5.3.6]	map00220 Arginine biosynthesis; map01100 Metabolic pathways; map01110 Biosynthesis of secondary metabolites; map01130 Biosynthesis of antibiotics	GO:0006082 organic acid metabolic process; GO:0006464 cellular protein modification process; GO:0006520 cellular amino acid metabolic process; GO:0006525 arginine metabolic process; GO:0006527 arginine catabolic process; GO:0006807 nitrogen compound metabolic process; GO:0008152 metabolic process; GO:0008218 bioluminescence; GO:0009056 catabolic process; GO:0009063 cellular amino acid catabolic p…	GO:0005623 cell; GO:0005886 plasma membrane; GO:0016020 membrane; GO:0071944 cell periphery;	GO:0003824 catalytic activity; GO:0016787 hydrolase activity; GO:0016810 hydrolase activity, acting on carbon-nitrogen (but not peptide) bonds; GO:0016813 hydrolase activity, acting on carbon-nitrogen (but not peptide) bonds, in linear amidines; GO:0016990 arginine deiminase activity;			E	COG2235	Arginine deiminase
Q8VQ15	Superoxide dismutase [Mn/Fe] OS=Staphylococcus epidermidis OX=1282 GN=sodA PE=1 SV=1	sodA	1.232	0.0392943	Up	22.706	38.7	8	1	32	0.845	1.13	1.2	0.973	0.925	0.91	Extracellular	K04564	SOD2; superoxide dismutase, Fe-Mn family [EC:1.15.1.1]		GO:0000302 response to reactive oxygen species; GO:0000303 response to superoxide; GO:0000305 response to oxygen radical; GO:0006801 superoxide metabolic process; GO:0006950 response to stress; GO:0006979 response to oxidative stress; GO:0008152 metabolic process; GO:0009266 response to temperature stimulus; GO:0009268 response to pH; GO:0009408 response to heat; GO:0009628 response to abiotic st…	GO:0005622 intracellular; GO:0005623 cell; GO:0005737 cytoplasm; GO:0005829 cytosol;	GO:0003676 nucleic acid binding; GO:0003677 DNA binding; GO:0003824 catalytic activity; GO:0004784 superoxide dismutase activity; GO:0005488 binding; GO:0016209 antioxidant activity; GO:0016491 oxidoreductase activity; GO:0016721 oxidoreductase activity, acting on superoxide radicals as acceptor; GO:0030145 manganese ion binding; GO:0043167 ion binding; GO:0043169 cation binding; GO:0046872 metal…	PF00081; PF02777	Iron/manganese superoxide dismutases, alpha-hairpin domain; Iron/manganese superoxide dismutases, C-terminal domain	C	COG0605	Superoxide dismutase
Q5HJY7	Serine--tRNA ligase OS=Staphylococcus aureus (strain COL) OX=93062 GN=serS PE=3 SV=1	serS	0.68	0.000185039	Down	48.639	21.5	8	1	48	1.226	0.829	0.854	0.781	1.217	1.178	Cytoplasmic	K01875	SARS, serS; seryl-tRNA synthetase [EC:6.1.1.11]	map00970 Aminoacyl-tRNA biosynthesis	GO:0006082 organic acid metabolic process; GO:0006139 nucleobase-containing compound metabolic process; GO:0006399 tRNA metabolic process; GO:0006412 translation; GO:0006418 tRNA aminoacylation for protein translation; GO:0006434 seryl-tRNA aminoacylation; GO:0006518 peptide metabolic process; GO:0006520 cellular amino acid metabolic process; GO:0006725 cellular aromatic compound metabolic proces…	GO:0005622 intracellular; GO:0005623 cell; GO:0005737 cytoplasm; GO:0005829 cytosol;	GO:0000287 magnesium ion binding; GO:0003824 catalytic activity; GO:0004812 aminoacyl-tRNA ligase activity; GO:0004828 serine-tRNA ligase activity; GO:0005488 binding; GO:0005515 protein binding; GO:0016874 ligase activity; GO:0016875 ligase activity, forming carbon-oxygen bonds; GO:0042802 identical protein binding; GO:0043167 ion binding; GO:0043169 cation binding; GO:0046872 metal ion binding;…	PF02403; PF00587	Seryl-tRNA synthetase N-terminal domain; tRNA synthetase class II core domain (G, H, P, S and T)	J	COG0172	Seryl-tRNA synthetase
A0A7M3F6D5	Accumulation-associated protein (Fragment) OS=Staphylococcus epidermidis OX=1282 GN=E1N11_12615 PE=4 SV=1	E1N11_12615	0.83	0.00224153	Down	56.022	78.4	43	1	262	1.096	0.959	0.881	0.906	1.124	1.088	Unknown	K14195	sasG; surface protein G	map05150 Staphylococcus aureus infection				PF07501	G5 domain	DM	COG4932	Predicted outer membrane protein
Q8CND1	Urease subunit gamma OS=Staphylococcus epidermidis (strain ATCC 12228 / FDA PCI 1200) OX=176280 GN=ureA PE=3 SV=2	ureA	0.713	0.000164738	Down	11.152	68	4	4	19	1.168	0.86	0.844	0.803	1.202	1.146	Cytoplasmic	K01430	ureA; urease subunit gamma [EC:3.5.1.5]	map00220 Arginine biosynthesis; map00230 Purine metabolism; map00791 Atrazine degradation; map01100 Metabolic pathways; map01120 Microbial metabolism in diverse environments				PF00547	Urease, gamma subunit	E	COG0831	Urea amidohydrolase (urease) gamma subunit
Q5HGU5	Phenylalanine--tRNA ligase beta subunit OS=Staphylococcus aureus (strain COL) OX=93062 GN=pheT PE=3 SV=1	pheT	1.466	0.0432538	Up	88.92	4.4	3	1	11	0.709	1.097	1.407	0.995	0.758	0.92	Cytoplasmic	K01890	FARSB, pheT; phenylalanyl-tRNA synthetase beta chain [EC:6.1.1.20]	map00970 Aminoacyl-tRNA biosynthesis	GO:0006082 organic acid metabolic process; GO:0006139 nucleobase-containing compound metabolic process; GO:0006399 tRNA metabolic process; GO:0006412 translation; GO:0006418 tRNA aminoacylation for protein translation; GO:0006432 phenylalanyl-tRNA aminoacylation; GO:0006518 peptide metabolic process; GO:0006520 cellular amino acid metabolic process; GO:0006725 cellular aromatic compound metabolic…	GO:0005618 cell wall; GO:0005622 intracellular; GO:0005623 cell; GO:0005737 cytoplasm; GO:0005829 cytosol; GO:0005886 plasma membrane; GO:0009328 phenylalanine-tRNA ligase complex; GO:0016020 membrane; GO:0030312 external encapsulating structure; GO:0032991 protein-containing complex; GO:0071944 cell periphery; GO:1902494 catalytic complex;	GO:0003824 catalytic activity; GO:0004812 aminoacyl-tRNA ligase activity; GO:0004826 phenylalanine-tRNA ligase activity; GO:0005488 binding; GO:0005515 protein binding; GO:0016874 ligase activity; GO:0016875 ligase activity, forming carbon-oxygen bonds; GO:0042802 identical protein binding; GO:0140098 catalytic activity, acting on RNA; GO:0140101 catalytic activity, acting on a tRNA;	PF01588; PF03483; PF03484; PF03147	Putative tRNA binding domain; B3/4 domain; tRNA synthetase B5 domain; Ferredoxin-fold anticodon binding domain	J	COG0073	EMAP domain
Q5HLP3	Uncharacterized protein OS=Staphylococcus epidermidis (strain ATCC 35984 / RP62A) OX=176279 GN=SERP1942 PE=4 SV=1	SERP1942	1.223	0.0287013	Up	24.274	10	2	2	2	0.954	0.996	1.149	1.149	0.841	0.898	CytoplasmicMembrane
Q5HGZ5	Ribonuclease J 1 OS=Staphylococcus aureus (strain COL) OX=93062 GN=rnj1 PE=3 SV=1	rnj1	0.68	0.000173646	Down	62.668	35.2	18	1	42	1.229	0.835	0.779	0.849	1.183	1.21	Cytoplasmic	K12574	rnj; ribonuclease J [EC:3.1.-.-]	map03018 RNA degradation	GO:0006139 nucleobase-containing compound metabolic process; GO:0006364 rRNA processing; GO:0006396 RNA processing; GO:0006397 mRNA processing; GO:0006725 cellular aromatic compound metabolic process; GO:0006807 nitrogen compound metabolic process; GO:0008152 metabolic process; GO:0009987 cellular process; GO:0010467 gene expression; GO:0016070 RNA metabolic process; GO:0016071 mRNA metabolic pro…		GO:0003824 catalytic activity; GO:0004518 nuclease activity; GO:0004519 endonuclease activity; GO:0004521 endoribonuclease activity; GO:0004527 exonuclease activity; GO:0004532 exoribonuclease activity; GO:0004534 5'-3' exoribonuclease activity; GO:0004540 ribonuclease activity; GO:0005488 binding; GO:0005515 protein binding; GO:0008409 5'-3' exonuclease activity; GO:0016787 hydrolase activity; G…	PF00753	Metallo-beta-lactamase superfamily	J	COG0595	Predicted hydrolase of the metallo-beta-lactamase superfamily
D4FJC9	Uncharacterized protein OS=Staphylococcus epidermidis M23864:W2(grey) OX=525375 GN=HMPREF0794_0667 PE=4 SV=1	HMPREF0794_0667	0.819	0.000250319	Down	23.943	27.1	4	4	7	1.106	0.879	0.886	0.924	1.09	1.089	Cytoplasmic									E	COG0346	Lactoylglutathione lyase and related lyases
A0A7T9WS21	Nramp family divalent metal transporter OS=Staphylococcus epidermidis OX=1282 GN=I6I40_09950 PE=4 SV=1	I6I40_09950	0.657	0.00266641	Down	49.287	6.5	2	2	3	1.229	0.836	0.849	0.735	1.319	1.134	CytoplasmicMembrane	K03322	mntH; manganese transport protein		GO:0009987 cellular process; GO:0010035 response to inorganic substance; GO:0010038 response to metal ion; GO:0010039 response to iron ion; GO:0042221 response to chemical; GO:0050896 response to stimulus; GO:0051716 cellular response to stimulus; GO:0070887 cellular response to chemical stimulus; GO:0071241 cellular response to inorganic substance; GO:0071248 cellular response to metal ion; GO:0…					P	COG1914	Mn2+ and Fe2+ transporters of the NRAMP family
D4FK03	Uncharacterized protein OS=Staphylococcus epidermidis M23864:W2(grey) OX=525375 GN=HMPREF0794_0891 PE=4 SV=1	HMPREF0794_0891	0.778	0.000396524	Down	93.221	36.3	34	17	113	1.153	0.912	0.875	0.85	1.122	1.114	Unknown	K10254	ohyA, sph; oleate hydratase [EC:4.2.1.53]		GO:0006082 organic acid metabolic process; GO:0006629 lipid metabolic process; GO:0006631 fatty acid metabolic process; GO:0008152 metabolic process; GO:0009987 cellular process; GO:0019752 carboxylic acid metabolic process; GO:0032787 monocarboxylic acid metabolic process; GO:0043436 oxoacid metabolic process; GO:0044237 cellular metabolic process; GO:0044238 primary metabolic process; GO:004425…		GO:0000166 nucleotide binding; GO:0003824 catalytic activity; GO:0005488 binding; GO:0005504 fatty acid binding; GO:0005515 protein binding; GO:0008289 lipid binding; GO:0016829 lyase activity; GO:0016835 carbon-oxygen lyase activity; GO:0016836 hydro-lyase activity; GO:0031406 carboxylic acid binding; GO:0033293 monocarboxylic acid binding; GO:0036094 small molecule binding; GO:0042802 identical…			S	COG4716	Myosin-crossreactive antigen
D4FL29	Alkaline phosphatase family protein OS=Staphylococcus epidermidis M23864:W2(grey) OX=525375 GN=HMPREF0794_1267 PE=3 SV=1	HMPREF0794_1267	0.722	0.000752513	Down	53.345	18.2	8	7	11	1.106	0.86	0.865	0.837	1.232	1.212	Extracellular	K01077	E3.1.3.1, phoA, phoB; alkaline phosphatase [EC:3.1.3.1]	map00730 Thiamine metabolism; map00790 Folate biosynthesis; map01100 Metabolic pathways; map02020 Two-component system				PF00245	Alkaline phosphatase	P	COG1785	Alkaline phosphatase
A0A7I0BY48	NAD(P)/FAD-dependent oxidoreductase OS=Staphylococcus epidermidis OX=1282 GN=E1M98_01455 PE=3 SV=1	E1M98_01455	1.478	0.0266039	Up	49.91	40.5	17	1	48	0.801	1.185	1.39	0.973	0.741	0.858	Cytoplasmic	K00383	GSR, gor; glutathione reductase (NADPH) [EC:1.8.1.7]	map00480 Glutathione metabolism; map01100 Metabolic pathways				PF07992; PF02852	Pyridine nucleotide-disulphide oxidoreductase; Pyridine nucleotide-disulphide oxidoreductase, dimerisation domain	C	COG1249	Pyruvate/2-oxoglutarate dehydrogenase complex, dihydrolipoamide dehydrogenase (E3) component, and related enzymes
D4FMV0	ThrE domain-containing protein OS=Staphylococcus epidermidis M23864:W2(grey) OX=525375 GN=HMPREF0794_1888 PE=4 SV=1	HMPREF0794_1888	0.734	0.0429312	Down	115.81	12.1	13	2	21	1.248	0.81	0.728	1.034	1.12	1.138	CytoplasmicMembrane									S	COG2966	Uncharacterized conserved protein
A0A0H2WX63	Acyl-coenzyme A:6-aminopenicillanic acid acyl-transferase OS=Staphylococcus aureus (strain COL) OX=93062 GN=SACOL1988 PE=4 SV=1	SACOL1988	1.821	0.000751962	Up	159.51	5	6	1	16	0.777	1.2	1.34	1.286	0.642	0.682	Unknown							PF03417	Acyl-coenzyme A:6-aminopenicillanic acid acyl-transferase	S	COG4927	Predicted choloylglycine hydrolase
Q8CR47	Xylulose kinase OS=Staphylococcus epidermidis (strain ATCC 12228 / FDA PCI 1200) OX=176280 GN=xylB PE=3 SV=1	xylB	1.479	0.0164095	Up	55.294	38.9	14	3	21	0.745	1.175	1.38	1.02	0.811	0.861	Cytoplasmic	K00854	xylB, XYLB; xylulokinase [EC:2.7.1.17]	map00040 Pentose and glucuronate interconversions; map01100 Metabolic pathways				PF00370; PF02782	FGGY family of carbohydrate kinases, N-terminal domain; FGGY family of carbohydrate kinases, C-terminal domain	G	COG1070	Sugar (pentulose and hexulose) kinases
A0A7T9WUI7	Transcription-repair coupling factor OS=Staphylococcus epidermidis OX=1282 GN=mfd PE=4 SV=1	mfd	0.712	0.0156854	Down	134.42	36.3	34	1	59	1.104	0.914	0.748	0.868	1.328	1.122	Cytoplasmic	K03723	mfd; transcription-repair coupling factor (superfamily II helicase) [EC:3.6.4.-]	map03420 Nucleotide excision repair				PF00270; PF03461	DEAD/DEAH box helicase; TRCF domain	L	COG1197	Transcription-repair coupling factor (superfamily II helicase)
A0A0H2VGF2	Oxidoreductase ion channel OS=Staphylococcus epidermidis (strain ATCC 12228 / FDA PCI 1200) OX=176280 GN=SE_0367 PE=4 SV=1	SE_0367	1.205	1.22938e-06	Up	35.003	82.7	23	6	72	0.903	1.092	1.089	1.099	0.906	0.912	Cytoplasmic							PF00248	Aldo/keto reductase family	C	COG0667	Predicted oxidoreductases (related to aryl-alcohol dehydrogenases)
A0A2R3SZJ4	Uncharacterized protein OS=Staphylococcus epidermidis OX=1282 PE=3 SV=1	--	0.791	0.0112484	Down	31.426	24.7	6	5	8	1.168	0.878	0.817	0.964	1.113	1.08	Unknown							PF04507	Protein of unknown function, DUF576
D4FLD3	Dehydrogenase E1 component OS=Staphylococcus epidermidis M23864:W2(grey) OX=525375 GN=acoA PE=4 SV=1	acoA	0.647	0.00168387	Down	34.786	48.6	17	1	31	1.261	0.782	0.727	0.885	1.22	1.22	Unknown	K21416	acoA; acetoin:2,6-dichlorophenolindophenol oxidoreductase subunit alpha [EC:1.1.1.-]							C	COG1071	Pyruvate/2-oxoglutarate dehydrogenase complex, dehydrogenase (E1) component, eukaryotic type, alpha subunit
A0A7I0APH0	LysR family transcriptional regulator OS=Staphylococcus epidermidis OX=1282 GN=E1N00_11925 PE=4 SV=1	E1N00_11925	0.71	0.0243749	Down	13.536	11	1	1	1	1.201	0.848	0.701	0.977	1.231	1.127	Unknown	K21959	ftsR; LysR family transcriptional regulator, cell division regulator							K	COG0583	Transcriptional regulator
Q8CML2	HTH-type transcriptional regulator ArcR OS=Staphylococcus epidermidis (strain ATCC 12228 / FDA PCI 1200) OX=176280 GN=arcR PE=3 SV=1	arcR	0.777	0.000403477	Down	26.924	26.8	6	6	8	1.173	0.903	0.857	0.885	1.123	1.107	Unknown	K21828	arcR; CRP/FNR family transcriptional regulator, arginine deiminase pathway regulator		GO:0006355 regulation of transcription, DNA-templated; GO:0009889 regulation of biosynthetic process; GO:0010468 regulation of gene expression; GO:0010556 regulation of macromolecule biosynthetic process; GO:0019219 regulation of nucleobase-containing compound metabolic process; GO:0019222 regulation of metabolic process; GO:0031323 regulation of cellular metabolic process; GO:0031326 regulation …			PF00027; PF13545	Cyclic nucleotide-binding domain; Crp-like helix-turn-helix domain	K	COG0664	cAMP-binding proteins - catabolite gene activator and regulatory subunit of cAMP-dependent protein kinases
Q8CTU5	Protein-arginine kinase OS=Staphylococcus epidermidis (strain ATCC 12228 / FDA PCI 1200) OX=176280 GN=mcsB PE=3 SV=1	mcsB	1.286	0.00591734	Up	38.458	44.8	11	3	25	0.843	1.118	1.188	1.057	0.843	0.93	Unknown	K19405	mcsB; protein arginine kinase [EC:2.7.14.1]		GO:0006950 response to stress; GO:0010035 response to inorganic substance; GO:0010038 response to metal ion; GO:0042221 response to chemical; GO:0046686 response to cadmium ion; GO:0046688 response to copper ion; GO:0050896 response to stimulus; GO:0097501 stress response to metal ion; GO:1990169 stress response to copper ion; GO:1990170 stress response to cadmium ion;			PF00217	ATP:guanido phosphotransferase, C-terminal catalytic domain	E	COG3869	Arginine kinase
A0A7I0BBM0	Glycosyltransferase OS=Staphylococcus epidermidis OX=1282 GN=E1N10_01940 PE=4 SV=1	E1N10_01940	1.224	0.00620052	Up	58.821	37.9	18	3	28	0.911	1.028	1.128	1.167	0.898	0.905	Unknown	K00712	tagE; poly(glycerol-phosphate) alpha-glucosyltransferase [EC:2.4.1.52]							M	COG0438	Glycosyltransferase
A0A0E1VH74	Abortive infection family protein (Fragment) OS=Staphylococcus epidermidis W23144 OX=525376 GN=HMPREF0791_0356 PE=4 SV=1	HMPREF0791_0356	1.438	0.0106159	Up	23.807	6.7	1	1	1	0.775	1.085	1.109	1.319	0.769	0.899	Unknown	K07052	K07052; uncharacterized protein							S	COG1266	Predicted metal-dependent membrane protease
D4FLQ8	YycH protein OS=Staphylococcus epidermidis M23864:W2(grey) OX=525375 GN=yycH PE=4 SV=1	yycH	0.772	0.00465647	Down	81.849	31.3	20	4	31	1.158	0.877	0.815	0.951	1.145	1.12	Unknown									S	COG4863	Uncharacterized protein conserved in bacteria
A0A7I0B083	Thiol reductant ABC exporter subunit CydC OS=Staphylococcus epidermidis OX=1282 GN=cydC PE=4 SV=1	cydC	1.267	0.00697444	Up	64.789	5.5	2	1	3	0.833	1.114	1.068	1.156	0.852	0.95	Unknown	K16012	cydC; ATP-binding cassette, subfamily C, bacterial CydC	map02010 ABC transporters				PF00005	ABC transporter	V	COG4987	ABC-type transport system involved in cytochrome bd biosynthesis, fused ATPase and permease components
A0A0E1VEH6	Thiamine_BP domain-containing protein OS=Staphylococcus epidermidis W23144 OX=525376 GN=HMPREF0791_1344 PE=3 SV=1	HMPREF0791_1344	1.255	0.0410329	Up	117.38	6.4	5	1	33	0.935	1.123	1.218	0.986	0.808	0.907	Cytoplasmic					GO:0005622 intracellular; GO:0005623 cell; GO:0005737 cytoplasm; GO:0005829 cytosol;		PF01910	Domain of unknown function DUF77	S	COG0011	Uncharacterized conserved protein
Q5HF65	Alanine dehydrogenase 2 OS=Staphylococcus aureus (strain COL) OX=93062 GN=ald2 PE=3 SV=1	ald2	0.823	0.000985322	Down	40.105	11.3	4	1	23	1.076	0.929	0.92	0.882	1.105	1.137	Cytoplasmic	K00259	ald; alanine dehydrogenase [EC:1.4.1.1]	map00250 Alanine, aspartate and glutamate metabolism; map00430 Taurine and hypotaurine metabolism; map01100 Metabolic pathways	GO:0006082 organic acid metabolic process; GO:0006520 cellular amino acid metabolic process; GO:0006522 alanine metabolic process; GO:0006524 alanine catabolic process; GO:0006807 nitrogen compound metabolic process; GO:0008152 metabolic process; GO:0009056 catabolic process; GO:0009063 cellular amino acid catabolic process; GO:0009078 pyruvate family amino acid metabolic process; GO:0009080 pyru…	GO:0005622 intracellular; GO:0005623 cell; GO:0005737 cytoplasm; GO:0005829 cytosol;	GO:0000286 alanine dehydrogenase activity; GO:0003824 catalytic activity; GO:0016491 oxidoreductase activity; GO:0016638 oxidoreductase activity, acting on the CH-NH2 group of donors;	PF05222; PF01262	Alanine dehydrogenase/PNT, N-terminal domain; Alanine dehydrogenase/PNT, C-terminal domain	E	COG0686	Alanine dehydrogenase
A0A0H2WZ54	Peptidase M20 domain-containing protein 2 OS=Staphylococcus aureus (strain COL) OX=93062 GN=SACOL2125 PE=3 SV=1	SACOL2125	1.288	0.0394444	Up	42.958	13.5	4	2	7	0.908	1.173	1.225	0.964	0.807	0.896	Cytoplasmic							PF07687	Peptidase dimerisation domain	F	COG1473	Metal-dependent amidase/aminoacylase/carboxypeptidase
Q5HKJ4	Ornithine carbamoyltransferase OS=Staphylococcus epidermidis (strain ATCC 35984 / RP62A) OX=176279 GN=arcB-2 PE=3 SV=1	arcB-2	0.665	0.000142324	Down	37.551	72.7	17	8	59	1.182	0.831	0.829	0.773	1.248	1.23	Cytoplasmic	K00611	OTC, argF, argI; ornithine carbamoyltransferase [EC:2.1.3.3]	map00220 Arginine biosynthesis; map01100 Metabolic pathways; map01110 Biosynthesis of secondary metabolites; map01130 Biosynthesis of antibiotics; map01230 Biosynthesis of amino acids	GO:0000050 urea cycle; GO:0006082 organic acid metabolic process; GO:0006520 cellular amino acid metabolic process; GO:0006525 arginine metabolic process; GO:0006526 arginine biosynthetic process; GO:0006591 ornithine metabolic process; GO:0006807 nitrogen compound metabolic process; GO:0006950 response to stress; GO:0006974 cellular response to DNA damage stimulus; GO:0008152 metabolic process; …	GO:0005622 intracellular; GO:0005623 cell; GO:0005737 cytoplasm;	GO:0003824 catalytic activity; GO:0004585 ornithine carbamoyltransferase activity; GO:0016740 transferase activity; GO:0016741 transferase activity, transferring one-carbon groups; GO:0016743 carboxyl- or carbamoyltransferase activity;	PF02729; PF00185	Aspartate/ornithine carbamoyltransferase, carbamoyl-P binding domain; Aspartate/ornithine carbamoyltransferase, Asp/Orn binding domain	E	COG0078	Ornithine carbamoyltransferase
A0A0H2VFS6	Alginate lyase OS=Staphylococcus epidermidis (strain ATCC 12228 / FDA PCI 1200) OX=176280 GN=SE_0096 PE=4 SV=1	SE_0096	1.366	7.06239e-05	Up	34.721	61.9	18	18	66	0.818	1.125	1.137	1.176	0.849	0.85	Cytoplasmic							PF08240; PF13602	Alcohol dehydrogenase GroES-like domain; Zinc-binding dehydrogenase	C	COG0604	NADPH:quinone reductase and related Zn-dependent oxidoreductases
Q5HLK0	Nitrate reductase (quinone) OS=Staphylococcus epidermidis (strain ATCC 35984 / RP62A) OX=176279 GN=narG PE=3 SV=1	narG	1.958	1.83319e-06	Up	139.77	47.8	49	36	150	0.672	1.26	1.301	1.315	0.652	0.656	CytoplasmicMembrane	K00370	narG, narZ, nxrA; nitrate reductase / nitrite oxidoreductase, alpha subunit [EC:1.7.5.1 1.7.99.-]	map00910 Nitrogen metabolism; map01100 Metabolic pathways; map01120 Microbial metabolism in diverse environments; map02020 Two-component system	GO:0006082 organic acid metabolic process; GO:0006091 generation of precursor metabolites and energy; GO:0006807 nitrogen compound metabolic process; GO:0008152 metabolic process; GO:0009061 anaerobic respiration; GO:0009987 cellular process; GO:0015980 energy derivation by oxidation of organic compounds; GO:0019645 anaerobic electron transport chain; GO:0022900 electron transport chain; GO:00229…	GO:0005623 cell; GO:0005886 plasma membrane; GO:0005887 integral component of plasma membrane; GO:0009325 nitrate reductase complex; GO:0009898 cytoplasmic side of plasma membrane; GO:0016020 membrane; GO:0016021 integral component of membrane; GO:0031224 intrinsic component of membrane; GO:0031226 intrinsic component of plasma membrane; GO:0031235 intrinsic component of the cytoplasmic side of t…	GO:0003824 catalytic activity; GO:0005488 binding; GO:0008940 nitrate reductase activity; GO:0009055 electron transfer activity; GO:0016491 oxidoreductase activity; GO:0016661 oxidoreductase activity, acting on other nitrogenous compounds as donors; GO:0043546 molybdopterin cofactor binding; GO:0048037 cofactor binding; GO:0050662 coenzyme binding; GO:0051536 iron-sulfur cluster binding; GO:00515…	PF01568	Molydopterin dinucleotide binding domain	C	COG5013	Nitrate reductase alpha subunit
Q5HKA9	Uncharacterized protein OS=Staphylococcus epidermidis (strain ATCC 35984 / RP62A) OX=176279 GN=SERP2439 PE=4 SV=1	SERP2439	1.212	0.000652116	Up	16.688	12.2	2	2	14	0.899	1.103	1.094	1.059	0.918	0.87	Extracellular
D4FMT8	Acetyl-CoA C-acetyltransferase OS=Staphylococcus epidermidis M23864:W2(grey) OX=525375 GN=atoB2 PE=3 SV=1	atoB2	1.224	0.0137878	Up	36.809	2.4	1	1	1	0.89	1.146	1.152	0.997	0.892	0.909	Cytoplasmic	K00626	E2.3.1.9, atoB; acetyl-CoA C-acetyltransferase [EC:2.3.1.9]	map00071 Fatty acid degradation; map00072 Synthesis and degradation of ketone bodies; map00280 Valine, leucine and isoleucine degradation; map00310 Lysine degradation; map00362 Benzoate degradation; map00380 Tryptophan metabolism; map00620 Pyruvate metabolism; map00630 Glyoxylate and dicarboxylate metabolism; map00640 Propanoate metabolism; map00650 Butanoate metabolism; map00720 Carbon fixation …				PF00108; PF02803	Thiolase, N-terminal domain; Thiolase, C-terminal domain	I	COG0183	Acetyl-CoA acetyltransferase
D4FID1	Citrate synthase OS=Staphylococcus epidermidis M23864:W2(grey) OX=525375 GN=gltA PE=3 SV=1	gltA	0.83	0.0250392	Down	42.708	56.6	19	2	63	1.158	0.893	0.844	0.982	1.07	1.048	Cytoplasmic	K01647	CS, gltA; citrate synthase [EC:2.3.3.1]	map00020 Citrate cycle (TCA cycle); map00630 Glyoxylate and dicarboxylate metabolism; map01100 Metabolic pathways; map01110 Biosynthesis of secondary metabolites; map01120 Microbial metabolism in diverse environments; map01130 Biosynthesis of antibiotics; map01200 Carbon metabolism; map01210 2-Oxocarboxylic acid metabolism; map01230 Biosynthesis of amino acids				PF00285	Citrate synthase	C	COG0372	Citrate synthase
Q5HQ53	Pyruvate carboxylase OS=Staphylococcus epidermidis (strain ATCC 35984 / RP62A) OX=176279 GN=pyc PE=4 SV=1	pyc	0.678	0.0235817	Down	197.47	47.5	70	2	270	1.39	0.856	0.693	0.912	1.115	1.127	Cytoplasmic	K01958	PC, pyc; pyruvate carboxylase [EC:6.4.1.1]	map00020 Citrate cycle (TCA cycle); map00620 Pyruvate metabolism; map00720 Carbon fixation pathways in prokaryotes; map01100 Metabolic pathways; map01120 Microbial metabolism in diverse environments; map01200 Carbon metabolism; map01230 Biosynthesis of amino acids	GO:0006082 organic acid metabolic process; GO:0006629 lipid metabolic process; GO:0006631 fatty acid metabolic process; GO:0006633 fatty acid biosynthetic process; GO:0008152 metabolic process; GO:0008610 lipid biosynthetic process; GO:0009058 biosynthetic process; GO:0009889 regulation of biosynthetic process; GO:0009890 negative regulation of biosynthetic process; GO:0009892 negative regulation…	GO:0005622 intracellular; GO:0005623 cell; GO:0005737 cytoplasm; GO:0005829 cytosol;	GO:0003824 catalytic activity; GO:0004075 biotin carboxylase activity; GO:0016874 ligase activity; GO:0016879 ligase activity, forming carbon-nitrogen bonds;	PF00289; PF02786; PF02785; PF00682; PF02436; PF00364	Carbamoyl-phosphate synthase L chain, N-terminal domain; Carbamoyl-phosphate synthase L chain, ATP binding domain; Biotin carboxylase C-terminal domain; HMGL-like; Conserved carboxylase domain; Biotin-requiring enzyme	C	COG1038	Pyruvate carboxylase
A0A7I0ALY8	Teichoic acid biosynthesis protein F OS=Staphylococcus epidermidis OX=1282 GN=E1N03_04655 PE=3 SV=1	E1N03_04655	0.759	0.0272439	Down	65.706	40.1	21	1	53	1.156	0.835	0.767	1.016	1.147	1.148	CytoplasmicMembrane									M	COG1887	Putative glycosyl/glycerophosphate transferases involved in teichoic acid biosynthesis TagF/TagB/EpsJ/RodC
D4FL81	N-acetylmuramoyl-L-alanine amidase OS=Staphylococcus epidermidis M23864:W2(grey) OX=525375 GN=HMPREF0794_1319 PE=3 SV=1	HMPREF0794_1319	0.729	0.0300088	Down	73.642	46.4	19	2	35	1.288	0.778	0.812	0.978	1.201	1.032	Extracellular							PF01832; PF05257	Mannosyl-glycoprotein endo-beta-N-acetylglucosaminidase; CHAP domain	NU	COG3942	Surface antigen
D2JCN0	Uncharacterized protein OS=Staphylococcus epidermidis OX=1282 GN=SAP025A_018 PE=4 SV=1	SAP025A_018	0.535	0.000168794	Down	4.2337	68.4	3	3	12	1.242	0.663	0.747	0.705	1.376	1.337	Extracellular
A0A0H2VE95	Galactosamine-containing minor teichoic acid biosynthesis protein OS=Staphylococcus epidermidis (strain ATCC 12228 / FDA PCI 1200) OX=176280 GN=SE_0168 PE=4 SV=1	SE_0168	1.327	0.0318148	Up	104.19	5.9	5	4	5	0.763	1.196	1.213	0.992	0.869	0.931	Cytoplasmic	K09809	tagF; CDP-glycerol glycerophosphotransferase [EC:2.7.8.12]							M	COG1887	Putative glycosyl/glycerophosphate transferases involved in teichoic acid biosynthesis TagF/TagB/EpsJ/RodC
A0A0H2VJ24	Uncharacterized protein OS=Staphylococcus epidermidis (strain ATCC 12228 / FDA PCI 1200) OX=176280 GN=SE_1885 PE=4 SV=1	SE_1885	0.823	0.0108359	Down	102.08	27.8	21	3	51	1.072	0.889	0.872	0.97	1.076	1.169	Unknown							PF08279	HTH domain	K	COG2378	Predicted transcriptional regulator
Q8CNY6	Glutamyl-tRNA reductase OS=Staphylococcus epidermidis (strain ATCC 12228 / FDA PCI 1200) OX=176280 GN=hemA PE=3 SV=1	hemA	1.308	0.000375527	Up	50.151	45.3	13	13	24	0.862	1.182	1.103	1.126	0.854	0.891	Cytoplasmic	K02492	hemA; glutamyl-tRNA reductase [EC:1.2.1.70]	map00860 Porphyrin and chlorophyll metabolism; map01100 Metabolic pathways; map01110 Biosynthesis of secondary metabolites; map01120 Microbial metabolism in diverse environments	GO:0006082 organic acid metabolic process; GO:0006520 cellular amino acid metabolic process; GO:0006536 glutamate metabolic process; GO:0006725 cellular aromatic compound metabolic process; GO:0006778 porphyrin-containing compound metabolic process; GO:0006779 porphyrin-containing compound biosynthetic process; GO:0006782 protoporphyrinogen IX biosynthetic process; GO:0006783 heme biosynthetic pr…	GO:0005623 cell; GO:0009288 bacterial-type flagellum; GO:0042597 periplasmic space; GO:0042995 cell projection; GO:0043226 organelle; GO:0043228 non-membrane-bounded organelle; GO:0055040 periplasmic flagellum;	GO:0003824 catalytic activity; GO:0005488 binding; GO:0005515 protein binding; GO:0008883 glutamyl-tRNA reductase activity; GO:0016491 oxidoreductase activity; GO:0016620 oxidoreductase activity, acting on the aldehyde or oxo group of donors, NAD or NADP as acceptor; GO:0016903 oxidoreductase activity, acting on the aldehyde or oxo group of donors; GO:0042802 identical protein binding; GO:0140098…	PF05201; PF00745	Glutamyl-tRNAGlu reductase, N-terminal domain; Glutamyl-tRNAGlu reductase, dimerisation domain	H	COG0373	Glutamyl-tRNA reductase
A0A0H2WYJ3	Conserved domain protein OS=Staphylococcus aureus (strain COL) OX=93062 GN=SACOL0207 PE=4 SV=1	SACOL0207	1.201	0.00209792	Up	117.25	4.4	3	1	11	0.908	1.076	1.084	1.093	0.861	0.94	CytoplasmicMembrane	K01126	E3.1.4.46, glpQ, ugpQ; glycerophosphoryl diester phosphodiesterase [EC:3.1.4.46]	map00564 Glycerophospholipid metabolism						C	COG4781	Membrane domain of membrane-anchored glycerophosphoryl diester phosphodiesterase
Q8CNF7	PTS system lactose-specific EIICB component OS=Staphylococcus epidermidis (strain ATCC 12228 / FDA PCI 1200) OX=176280 GN=lacE PE=3 SV=1	lacE	0.773	0.0037935	Down	63.765	15.1	8	8	11	1.147	0.874	0.813	0.942	1.121	1.135	CytoplasmicMembrane	K02788	PTS-Lac-EIIC, lacE; PTS system, lactose-specific IIC component	map00052 Galactose metabolism; map01100 Metabolic pathways; map02060 Phosphotransferase system (PTS)				PF02302	PTS system, Lactose/Cellobiose specific IIB subunit	G	COG1455	Phosphotransferase system cellobiose-specific component IIC
Q5HJZ1	DNA gyrase subunit B OS=Staphylococcus aureus (strain COL) OX=93062 GN=gyrB PE=3 SV=3	gyrB	1.216	0.00501866	Up	72.511	21.4	12	1	27	0.859	1.112	1.123	1.052	0.948	0.896	Cytoplasmic	K02470	gyrB; DNA gyrase subunit B [EC:5.6.2.2]		GO:0006139 nucleobase-containing compound metabolic process; GO:0006259 DNA metabolic process; GO:0006265 DNA topological change; GO:0006725 cellular aromatic compound metabolic process; GO:0006807 nitrogen compound metabolic process; GO:0006996 organelle organization; GO:0007059 chromosome segregation; GO:0008152 metabolic process; GO:0009987 cellular process; GO:0016043 cellular component organ…	GO:0005618 cell wall; GO:0005623 cell; GO:0005886 plasma membrane; GO:0009295 nucleoid; GO:0016020 membrane; GO:0030312 external encapsulating structure; GO:0071944 cell periphery;	GO:0000166 nucleotide binding; GO:0000287 magnesium ion binding; GO:0003824 catalytic activity; GO:0003916 DNA topoisomerase activity; GO:0003918 DNA topoisomerase type II (double strand cut, ATP-hydrolyzing) activity; GO:0005488 binding; GO:0005524 ATP binding; GO:0008094 DNA-dependent ATPase activity; GO:0008144 drug binding; GO:0016462 pyrophosphatase activity; GO:0016787 hydrolase activity; G…	PF02518; PF00204	Histidine kinase-, DNA gyrase B-, and HSP90-like ATPase; DNA gyrase B	L	COG0187	Type IIA topoisomerase (DNA gyrase/topo II, topoisomerase IV), B subunit
A0A0H2VJB5	ABC transporter ecsB OS=Staphylococcus epidermidis (strain ATCC 12228 / FDA PCI 1200) OX=176280 GN=SE_1516 PE=4 SV=1	SE_1516	0.793	0.000449145	Down	48.581	14.7	6	2	11	1.134	0.908	0.859	0.914	1.142	1.106	CytoplasmicMembrane	K01992	ABC-2.P; ABC-2 type transport system permease protein							U	COG4473	Predicted ABC-type exoprotein transport system, permease component
Q8CT62	NAD kinase OS=Staphylococcus epidermidis (strain ATCC 12228 / FDA PCI 1200) OX=176280 GN=nadK PE=3 SV=1	nadK	1.263	0.0266648	Up	30.603	16.7	4	4	16	0.844	1.139	1.221	0.985	0.901	0.904	Cytoplasmic	K00858	ppnK, NADK; NAD+ kinase [EC:2.7.1.23]	map00760 Nicotinate and nicotinamide metabolism; map01100 Metabolic pathways	GO:0006139 nucleobase-containing compound metabolic process; GO:0006725 cellular aromatic compound metabolic process; GO:0006732 coenzyme metabolic process; GO:0006733 oxidoreduction coenzyme metabolic process; GO:0006739 NADP metabolic process; GO:0006741 NADP biosynthetic process; GO:0006753 nucleoside phosphate metabolic process; GO:0006766 vitamin metabolic process; GO:0006767 water-soluble v…	GO:0005622 intracellular; GO:0005623 cell; GO:0005737 cytoplasm; GO:0005829 cytosol;	GO:0000166 nucleotide binding; GO:0003824 catalytic activity; GO:0003951 NAD+ kinase activity; GO:0005488 binding; GO:0005524 ATP binding; GO:0008144 drug binding; GO:0008976 polyphosphate kinase activity; GO:0016301 kinase activity; GO:0016740 transferase activity; GO:0016772 transferase activity, transferring phosphorus-containing groups; GO:0016773 phosphotransferase activity, alcohol group as…			F	COG0061	Predicted sugar kinase
Q5HPE8	Aspartate-semialdehyde dehydrogenase OS=Staphylococcus epidermidis (strain ATCC 35984 / RP62A) OX=176279 GN=asd PE=3 SV=1	asd	1.319	6.1133e-05	Up	36.395	36.2	10	10	12	0.852	1.111	1.156	1.155	0.865	0.878	Cytoplasmic	K00133	asd; aspartate-semialdehyde dehydrogenase [EC:1.2.1.11]	map00260 Glycine, serine and threonine metabolism; map00261 Monobactam biosynthesis; map00270 Cysteine and methionine metabolism; map00300 Lysine biosynthesis; map01100 Metabolic pathways; map01110 Biosynthesis of secondary metabolites; map01120 Microbial metabolism in diverse environments; map01130 Biosynthesis of antibiotics; map01210 2-Oxocarboxylic acid metabolism; map01230 Biosynthesis of am…				PF01118; PF02774	Semialdehyde dehydrogenase, NAD binding domain; Semialdehyde dehydrogenase, dimerisation domain	E	COG0136	Aspartate-semialdehyde dehydrogenase
Q8CSD3	Endoribonuclease YbeY OS=Staphylococcus epidermidis (strain ATCC 12228 / FDA PCI 1200) OX=176280 GN=ybeY PE=3 SV=1	ybeY	0.827	0.011638	Down	17.998	55.5	6	3	18	1.199	0.918	0.905	0.918	1.042	1.075	Cytoplasmic	K07042	ybeY, yqfG; probable rRNA maturation factor		GO:0000469 cleavage involved in rRNA processing; GO:0000478 endonucleolytic cleavage involved in rRNA processing; GO:0006139 nucleobase-containing compound metabolic process; GO:0006355 regulation of transcription, DNA-templated; GO:0006364 rRNA processing; GO:0006396 RNA processing; GO:0006412 translation; GO:0006518 peptide metabolic process; GO:0006725 cellular aromatic compound metabolic proc…		GO:0003824 catalytic activity; GO:0004518 nuclease activity; GO:0004519 endonuclease activity; GO:0004521 endoribonuclease activity; GO:0004540 ribonuclease activity; GO:0005488 binding; GO:0016151 nickel cation binding; GO:0016787 hydrolase activity; GO:0016788 hydrolase activity, acting on ester bonds; GO:0016892 endoribonuclease activity, producing 3'-phosphomonoesters; GO:0016894 endonuclease…			J	COG0319	Predicted metal-dependent hydrolase
Q5HL39	Uncharacterized protein OS=Staphylococcus epidermidis (strain ATCC 35984 / RP62A) OX=176279 GN=SERP2148 PE=4 SV=1	SERP2148	1.228	0.0342549	Up	49.692	12.4	6	6	8	0.958	1.086	1.186	0.996	0.867	0.836	Unknown	K21463	tcaA; membrane-associated protein TcaA					PF13248	zinc-ribbon domain	S	COG4640	Predicted membrane protein
A0A0H2WZM9	Coenzyme A biosynthesis bifunctional protein CoaBC OS=Staphylococcus aureus (strain COL) OX=93062 GN=coaBC PE=3 SV=1	coaBC	1.293	0.000124063	Up	44.399	6.7	3	1	5	0.871	1.104	1.163	1.104	0.866	0.87	Cytoplasmic	K13038	coaBC, dfp; phosphopantothenoylcysteine decarboxylase / phosphopantothenate---cysteine ligase [EC:4.1.1.36 6.3.2.5]	map00770 Pantothenate and CoA biosynthesis; map01100 Metabolic pathways						H	COG0452	Phosphopantothenoylcysteine synthetase/decarboxylase
A0A0H2X0A1	Uncharacterized protein OS=Staphylococcus aureus (strain COL) OX=93062 GN=SACOL0427 PE=4 SV=1	SACOL0427	1.528	0.0034432	Up	104.26	2.7	3	2	5	0.798	1.121	1.364	1.111	0.772	0.784	Cytoplasmic									S	COG1878	Predicted metal-dependent hydrolase
A0A0H2VIT3	Uncharacterized protein OS=Staphylococcus epidermidis (strain ATCC 12228 / FDA PCI 1200) OX=176280 GN=SE_p504 PE=4 SV=1	SE_p504	0.754	0.0249064	Down	12.507	45.8	4	4	9	1.212	0.839	0.774	0.998	1.171	1.082	CytoplasmicMembrane	K10947	padR; PadR family transcriptional regulator, regulatory protein PadR					PF03551	Transcriptional regulator PadR-like family	K	COG1695	Predicted transcriptional regulators
A0A4Q9W3H8	CoA-disulfide reductase OS=Staphylococcus epidermidis OX=1282 GN=D9V05_07110 PE=4 SV=1	D9V05_07110	1.203	8.14358e-05	Up	50.119	35.8	16	12	26	0.923	1.08	1.094	1.097	0.904	0.891	Cytoplasmic	K05910	npr; NADH peroxidase [EC:1.11.1.1]					PF07992; PF02852	Pyridine nucleotide-disulphide oxidoreductase; Pyridine nucleotide-disulphide oxidoreductase, dimerisation domain	C	COG0446	Uncharacterized NAD(FAD)-dependent dehydrogenases
A0A6N4IV69	Transcriptional regulator (Fragment) OS=Staphylococcus epidermidis OX=1282 GN=E1N09_12260 PE=4 SV=1	E1N09_12260	1.766	0.00561828	Up	6.0827	34	2	1	7	0.651	1.067	1.416	1.3	0.689	0.802	Cytoplasmic									K	COG1846	Transcriptional regulators
A0A7I0ASE6	Aldo/keto reductase OS=Staphylococcus epidermidis OX=1282 GN=CP553_07290 PE=4 SV=1	CP553_07290	1.637	0.000251629	Up	32.126	36.7	10	1	28	0.728	1.234	1.3	1.152	0.746	0.778	Cytoplasmic							PF00248	Aldo/keto reductase family	S	COG0656	Aldo/keto reductases, related to diketogulonate reductase
Q5HM45	Uncharacterized protein OS=Staphylococcus epidermidis (strain ATCC 35984 / RP62A) OX=176279 GN=SERP1784 PE=4 SV=1	SERP1784	1.36	0.0001715	Up	62.796	12.2	8	7	20	0.852	1.108	1.18	1.164	0.86	0.826	CytoplasmicMembrane									S	COG1302	Uncharacterized protein conserved in bacteria
Q8CR04	Adenylyl-sulfate kinase OS=Staphylococcus epidermidis (strain ATCC 12228 / FDA PCI 1200) OX=176280 GN=cysC PE=3 SV=1	cysC	1.408	0.000915476	Up	22.628	19.6	4	4	4	0.852	1.107	1.157	1.222	0.783	0.841	Cytoplasmic	K00860	cysC; adenylylsulfate kinase [EC:2.7.1.25]	map00230 Purine metabolism; map00920 Sulfur metabolism; map01100 Metabolic pathways; map01120 Microbial metabolism in diverse environments				PF01583	Adenylylsulphate kinase	F	COG0529	Adenylylsulfate kinase and related kinases
A0A7I0AW52	Uncharacterized protein (Fragment) OS=Staphylococcus epidermidis OX=1282 GN=E1M98_12720 PE=4 SV=1	E1M98_12720	1.773	7.06434e-06	Up	5.0144	73.8	7	7	27	0.685	1.209	1.272	1.248	0.706	0.712	Extracellular
A0A0H2WZ87	Ribosomal RNA small subunit methyltransferase E OS=Staphylococcus aureus (strain COL) OX=93062 GN=SACOL1634 PE=3 SV=1	SACOL1634	0.343	2.00082e-05	Down	107.77	1.8	2	1	4	1.529	0.572	0.511	0.494	1.505	1.57	Unknown	K09761	rsmE; 16S rRNA (uracil1498-N3)-methyltransferase [EC:2.1.1.193]		GO:0000154 rRNA modification; GO:0001510 RNA methylation; GO:0006139 nucleobase-containing compound metabolic process; GO:0006364 rRNA processing; GO:0006396 RNA processing; GO:0006725 cellular aromatic compound metabolic process; GO:0006807 nitrogen compound metabolic process; GO:0008152 metabolic process; GO:0009451 RNA modification; GO:0009987 cellular process; GO:0010467 gene expression; GO:0…		GO:0003824 catalytic activity; GO:0008168 methyltransferase activity; GO:0008170 N-methyltransferase activity; GO:0008173 RNA methyltransferase activity; GO:0008649 rRNA methyltransferase activity; GO:0008757 S-adenosylmethionine-dependent methyltransferase activity; GO:0016436 rRNA (uridine) methyltransferase activity; GO:0016740 transferase activity; GO:0016741 transferase activity, transferrin…			J	COG1385	Uncharacterized protein conserved in bacteria
A0A3G1RMX1	Ser-Asp rich fibrinogen-binding protein OS=Staphylococcus epidermidis OX=1282 PE=4 SV=1	--	0.774	0.00818466	Down	161.03	2	2	2	3	1.08	0.821	0.939	0.882	1.117	1.217	Cellwall	K14195	sasG; surface protein G	map05150 Staphylococcus aureus infection				PF07501	G5 domain	DM	COG4932	Predicted outer membrane protein
Q5HL75	Alcohol dehydrogenase OS=Staphylococcus epidermidis (strain ATCC 35984 / RP62A) OX=176279 GN=SERP2112 PE=3 SV=1	SERP2112	0.808	1.65833e-06	Down	37.814	51.7	14	14	59	1.107	0.901	0.894	0.898	1.121	1.106	Cytoplasmic	K18369	adh2; alcohol dehydrogenase [EC:1.1.1.-]	map00640 Propanoate metabolism; map01100 Metabolic pathways				PF08240	Alcohol dehydrogenase GroES-like domain	E	COG1063	Threonine dehydrogenase and related Zn-dependent dehydrogenases
Q5HL87	Ribokinase OS=Staphylococcus epidermidis (strain ATCC 35984 / RP62A) OX=176279 GN=rbsK PE=3 SV=1	rbsK	0.826	4.11868e-05	Down	33.109	53.7	15	15	38	1.108	0.923	0.896	0.915	1.109	1.094	Cytoplasmic	K00852	rbsK, RBKS; ribokinase [EC:2.7.1.15]	map00030 Pentose phosphate pathway; map01100 Metabolic pathways						H	COG0524	Sugar kinases, ribokinase family
A0A7G9ECB3	Beta-lactamase OS=Staphylococcus epidermidis OX=1282 GN=ATM22_04235 PE=3 SV=1	ATM22_04235	0.547	0.00228029	Down	31.409	53.4	17	8	25	1.315	0.715	0.597	0.8	1.312	1.231	Cellwall	K18766	blaZ; beta-lactamase class A BlaZ [EC:3.5.2.6]	map01501 beta-Lactam resistance		GO:0005576 extracellular region;		PF13354	Beta-lactamase enzyme family	V	COG2367	Beta-lactamase class A
A0A0H2VHD1	Ferrichrome ABC transporter OS=Staphylococcus epidermidis (strain ATCC 12228 / FDA PCI 1200) OX=176280 GN=SE_1768 PE=4 SV=1	SE_1768	2.305	5.31826e-06	Up	83.527	24.3	21	19	47	0.564	1.332	1.372	1.381	0.6	0.608	CytoplasmicMembrane	K23181	fecB; ferric citrate transport system substrate-binding protein	map02010 ABC transporters	GO:0006810 transport; GO:0010035 response to inorganic substance; GO:0010038 response to metal ion; GO:0010039 response to iron ion; GO:0042221 response to chemical; GO:0042592 homeostatic process; GO:0048878 chemical homeostasis; GO:0050801 ion homeostasis; GO:0050896 response to stimulus; GO:0051179 localization; GO:0051234 establishment of localization; GO:0055065 metal ion homeostasis; GO:005…	GO:0005623 cell; GO:0030288 outer membrane-bounded periplasmic space; GO:0030313 cell envelope; GO:0031975 envelope; GO:0042597 periplasmic space;		PF01497	Periplasmic binding protein	P	COG4594	ABC-type Fe3+-citrate transport system, periplasmic component
Q8CNG0	Alkaline shock protein 23 OS=Staphylococcus epidermidis (strain ATCC 12228 / FDA PCI 1200) OX=176280 GN=asp23 PE=3 SV=1	asp23	1.379	0.000373183	Up	18.689	63.9	8	8	109	0.812	1.144	1.196	1.09	0.833	0.842	Unknown									S	COG1302	Uncharacterized protein conserved in bacteria
A0A6N4IYE7	Uncharacterized protein (Fragment) OS=Staphylococcus epidermidis OX=1282 GN=E1N09_09045 PE=4 SV=1	E1N09_09045	1.303	0.0410004	Up	6.232	72.5	3	3	13	0.786	1.163	1.227	0.963	0.859	0.929	Unknown									S	COG4476	Uncharacterized protein conserved in bacteria
A0A0H2VIY1	Uncharacterized protein OS=Staphylococcus epidermidis (strain ATCC 12228 / FDA PCI 1200) OX=176280 GN=SE_p202 PE=4 SV=1	SE_p202	0.801	0.00197302	Down	68.31	45.3	20	7	60	1.105	0.936	0.901	0.843	1.123	1.118	CytoplasmicMembrane
Q5HRU8	Cysteine synthase/cystathionine beta-synthase family protein OS=Staphylococcus epidermidis (strain ATCC 35984 / RP62A) OX=176279 GN=SERP0094 PE=4 SV=1	SERP0094	1.252	0.0218131	Up	32.793	40.1	8	8	12	0.845	1.117	0.974	1.188	0.889	0.884	Unknown	K17216	mccA; cystathionine beta-synthase (O-acetyl-L-serine) [EC:2.5.1.134]	map00270 Cysteine and methionine metabolism; map01100 Metabolic pathways; map01230 Biosynthesis of amino acids	GO:0000096 sulfur amino acid metabolic process; GO:0000097 sulfur amino acid biosynthetic process; GO:0006082 organic acid metabolic process; GO:0006520 cellular amino acid metabolic process; GO:0006534 cysteine metabolic process; GO:0006535 cysteine biosynthetic process from serine; GO:0006563 L-serine metabolic process; GO:0006790 sulfur compound metabolic process; GO:0006807 nitrogen compound …	GO:0005622 intracellular; GO:0005623 cell; GO:0005737 cytoplasm;	GO:0003824 catalytic activity; GO:0004122 cystathionine beta-synthase activity; GO:0004124 cysteine synthase activity; GO:0005488 binding; GO:0008144 drug binding; GO:0016740 transferase activity; GO:0016765 transferase activity, transferring alkyl or aryl (other than methyl) groups; GO:0016829 lyase activity; GO:0016835 carbon-oxygen lyase activity; GO:0016836 hydro-lyase activity; GO:0016846 ca…			E	COG0031	Cysteine synthase
A0A0E1VBM2	Uncharacterized protein OS=Staphylococcus epidermidis W23144 OX=525376 GN=HMPREF0791_2399 PE=4 SV=1	HMPREF0791_2399	1.337	0.0157082	Up	5.08	31	1	1	3	0.766	1.137	1.228	1.037	0.861	0.918	Unknown
D4FKA1	Uncharacterized protein OS=Staphylococcus epidermidis M23864:W2(grey) OX=525375 GN=HMPREF0794_0989 PE=3 SV=1	HMPREF0794_0989	0.83	0.0220457	Down	155.54	12.9	14	6	45	1.129	0.916	0.846	0.993	1.135	1.056	Cytoplasmic									S	COG3832	Uncharacterized conserved protein
Q5HNX5	Uncharacterized protein OS=Staphylococcus epidermidis (strain ATCC 35984 / RP62A) OX=176279 GN=SERP1139 PE=4 SV=1	SERP1139	0.736	7.59475e-05	Down	75.242	32.2	21	10	41	1.174	0.876	0.83	0.877	1.173	1.163	Unknown
Q8CTB2	Methionine import ATP-binding protein MetN 1 OS=Staphylococcus epidermidis (strain ATCC 12228 / FDA PCI 1200) OX=176280 GN=metN1 PE=3 SV=1	metN1	1.324	0.00108229	Up	38.441	7.6	2	2	4	0.832	1.066	1.182	1.143	0.859	0.87	CytoplasmicMembrane	K02071	metN; D-methionine transport system ATP-binding protein	map02010 ABC transporters	GO:0006810 transport; GO:0051179 localization; GO:0051234 establishment of localization; GO:0055085 transmembrane transport;		GO:0003824 catalytic activity; GO:0005215 transporter activity; GO:0015399 primary active transmembrane transporter activity; GO:0016462 pyrophosphatase activity; GO:0016787 hydrolase activity; GO:0016817 hydrolase activity, acting on acid anhydrides; GO:0016818 hydrolase activity, acting on acid anhydrides, in phosphorus-containing anhydrides; GO:0016887 ATPase activity; GO:0017111 nucleoside-tr…	PF00005; PF09383	ABC transporter; NIL domain	P	COG1135	ABC-type metal ion transport system, ATPase component
Q8CPL4	UvrABC system protein C OS=Staphylococcus epidermidis (strain ATCC 12228 / FDA PCI 1200) OX=176280 GN=uvrC PE=3 SV=2	uvrC	1.215	0.00622265	Up	68.837	23.4	11	11	15	0.92	1.062	1.18	1.06	0.908	0.89	Cytoplasmic	K03703	uvrC; excinuclease ABC subunit C	map03420 Nucleotide excision repair	GO:0006950 response to stress; GO:0006974 cellular response to DNA damage stimulus; GO:0009987 cellular process; GO:0033554 cellular response to stress; GO:0050896 response to stimulus; GO:0051716 cellular response to stimulus;	GO:0005622 intracellular; GO:0005623 cell; GO:0009380 excinuclease repair complex; GO:0032991 protein-containing complex; GO:1902494 catalytic complex; GO:1905347 endodeoxyribonuclease complex; GO:1905348 endonuclease complex; GO:1990391 DNA repair complex;		PF01541	GIY-YIG catalytic domain	L	COG0322	Nuclease subunit of the excinuclease complex
A0A0E1VET6	DUF2179 domain-containing protein OS=Staphylococcus epidermidis W23144 OX=525376 GN=HMPREF0791_0535 PE=4 SV=1	HMPREF0791_0535	1.581	0.0241194	Up	126.22	23	22	3	59	0.714	1.122	1.501	1.014	0.753	0.834	CytoplasmicMembrane							PF10035	Uncharacterized protein conserved in bacteria (DUF2179)	S	COG1284	Uncharacterized conserved protein
Q5HQZ3	Transferrin receptor OS=Staphylococcus epidermidis (strain ATCC 35984 / RP62A) OX=176279 GN=SERP0403 PE=4 SV=1	SERP0403	1.841	9.52874e-07	Up	38.433	50.1	18	18	41	0.699	1.291	1.278	1.27	0.68	0.706	CytoplasmicMembrane	K02016	ABC.FEV.S; iron complex transport system substrate-binding protein					PF01497	Periplasmic binding protein	P	COG4607	ABC-type enterochelin transport system, periplasmic component
Q8CPW0	D-alanyl carrier protein OS=Staphylococcus epidermidis (strain ATCC 12228 / FDA PCI 1200) OX=176280 GN=dltC PE=3 SV=1	dltC	0.802	0.000169869	Down	9.0631	33.3	2	2	16	1.128	0.925	0.88	0.898	1.107	1.134	Cytoplasmic	K14188	dltC; D-alanine--poly(phosphoribitol) ligase subunit 2 [EC:6.1.1.13]	map00473 D-Alanine metabolism; map01100 Metabolic pathways; map01503 Cationic antimicrobial peptide (CAMP) resistance; map02020 Two-component system; map05150 Staphylococcus aureus infection	GO:0000270 peptidoglycan metabolic process; GO:0006022 aminoglycan metabolic process; GO:0006023 aminoglycan biosynthetic process; GO:0006024 glycosaminoglycan biosynthetic process; GO:0006807 nitrogen compound metabolic process; GO:0006810 transport; GO:0008152 metabolic process; GO:0009058 biosynthetic process; GO:0009059 macromolecule biosynthetic process; GO:0009252 peptidoglycan biosynthetic…		GO:0005215 transporter activity; GO:0022857 transmembrane transporter activity;	PF00550	Phosphopantetheine attachment site	IQ	COG0236	Acyl carrier protein
A0A0H2VFS9	DUF4064 domain-containing protein OS=Staphylococcus epidermidis (strain ATCC 12228 / FDA PCI 1200) OX=176280 GN=SE_0802 PE=4 SV=1	SE_0802	1.286	0.000689413	Up	15.142	18.5	2	1	8	0.814	1.032	1.049	1.119	0.84	0.834	CytoplasmicMembrane
Q8CT04	UPF0358 protein SE_0811 OS=Staphylococcus epidermidis (strain ATCC 12228 / FDA PCI 1200) OX=176280 GN=SE_0811 PE=3 SV=1	SE_0811	0.534	0.00478893	Down	10.409	12.1	1	1	2	1.392	0.707	0.59	0.839	1.398	1.21	Unknown									S	COG4838	Uncharacterized protein conserved in bacteria
A0A7I0BK19	Uncharacterized protein OS=Staphylococcus epidermidis OX=1282 GN=CP553_03760 PE=4 SV=1	CP553_03760	0.487	1.09038e-05	Down	48.858	7.4	3	2	4	1.369	0.697	0.675	0.637	1.374	1.383	Unknown							PF05908	Protein of unknown function (DUF867)	S	COG4195	Phage-related replication protein
Q5HDX3	50S ribosomal protein L6 OS=Staphylococcus aureus (strain COL) OX=93062 GN=rplF PE=3 SV=1	rplF	1.559	0.0145861	Up	19.786	15.2	3	1	5	0.662	1.032	1.288	1.302	0.811	0.85	Cytoplasmic	K02933	RP-L6, MRPL6, rplF; large subunit ribosomal protein L6	map03010 Ribosome	GO:0000027 ribosomal large subunit assembly; GO:0002181 cytoplasmic translation; GO:0006412 translation; GO:0006518 peptide metabolic process; GO:0006807 nitrogen compound metabolic process; GO:0006996 organelle organization; GO:0008152 metabolic process; GO:0009058 biosynthetic process; GO:0009059 macromolecule biosynthetic process; GO:0009987 cellular process; GO:0010467 gene expression; GO:001…	GO:0005618 cell wall; GO:0005622 intracellular; GO:0005623 cell; GO:0005737 cytoplasm; GO:0005829 cytosol; GO:0005840 ribosome; GO:0005886 plasma membrane; GO:0015934 large ribosomal subunit; GO:0016020 membrane; GO:0022625 cytosolic large ribosomal subunit; GO:0022626 cytosolic ribosome; GO:0030312 external encapsulating structure; GO:0032991 protein-containing complex; GO:0043226 organelle; GO:…	GO:0003676 nucleic acid binding; GO:0003723 RNA binding; GO:0003735 structural constituent of ribosome; GO:0005198 structural molecule activity; GO:0005488 binding; GO:0019843 rRNA binding; GO:0070180 large ribosomal subunit rRNA binding; GO:0097159 organic cyclic compound binding; GO:1901363 heterocyclic compound binding;	PF00347	Ribosomal protein L6	J	COG0097	Ribosomal protein L6P/L9E
Q3MQ51	Chloramphenicol/florfenicol exporter OS=Staphylococcus aureus OX=1280 GN=fexA PE=4 SV=1	fexA	1.378	0.000822806	Up	49.325	1.5	1	1	2	0.843	1.152	1.22	1.085	0.82	0.846	CytoplasmicMembrane	K08168	tetB; MFS transporter, DHA2 family, metal-tetracycline-proton antiporter							EGP	COG2814	Arabinose efflux permease
Q8CRB0	Putative hemin import ATP-binding protein HrtA OS=Staphylococcus epidermidis (strain ATCC 12228 / FDA PCI 1200) OX=176280 GN=hrtA PE=3 SV=1	hrtA	0.599	0.00946219	Down	24.544	24.3	6	3	8	1.346	0.779	0.623	0.889	1.302	1.176	CytoplasmicMembrane	K09814	hrtA; hemin transport system ATP-binding protein [EC:3.6.3.-]	map02010 ABC transporters				PF00005	ABC transporter	P	COG1136	ABC-type antimicrobial peptide transport system, ATPase component
Q8CRG4	30S ribosomal protein S19 OS=Staphylococcus epidermidis (strain ATCC 12228 / FDA PCI 1200) OX=176280 GN=rpsS PE=3 SV=1	rpsS	1.203	0.000113763	Up	10.559	77.2	11	11	81	0.891	1.064	1.096	1.062	0.883	0.904	Cytoplasmic	K02965	RP-S19, rpsS; small subunit ribosomal protein S19	map03010 Ribosome	GO:0000028 ribosomal small subunit assembly; GO:0006412 translation; GO:0006518 peptide metabolic process; GO:0006807 nitrogen compound metabolic process; GO:0006996 organelle organization; GO:0008152 metabolic process; GO:0009058 biosynthetic process; GO:0009059 macromolecule biosynthetic process; GO:0009987 cellular process; GO:0010467 gene expression; GO:0016043 cellular component organization…	GO:0005622 intracellular; GO:0005623 cell; GO:0005737 cytoplasm; GO:0005829 cytosol; GO:0005840 ribosome; GO:0005886 plasma membrane; GO:0015935 small ribosomal subunit; GO:0016020 membrane; GO:0022626 cytosolic ribosome; GO:0022627 cytosolic small ribosomal subunit; GO:0032991 protein-containing complex; GO:0043226 organelle; GO:0043228 non-membrane-bounded organelle; GO:0043229 intracellular or…	GO:0003735 structural constituent of ribosome; GO:0005198 structural molecule activity;	PF00203	Ribosomal protein S19	J	COG0185	Ribosomal protein S19
Q5HFV0	DNA-binding protein HU OS=Staphylococcus aureus (strain COL) OX=93062 GN=hup PE=3 SV=1	hup	1.217	0.0084393	Up	9.6259	82.2	12	1	310	0.898	1.086	1.176	1.024	0.897	0.906	Cytoplasmic	K03530	hupB; DNA-binding protein HU-beta		GO:0009889 regulation of biosynthetic process; GO:0010556 regulation of macromolecule biosynthetic process; GO:0019219 regulation of nucleobase-containing compound metabolic process; GO:0019222 regulation of metabolic process; GO:0031323 regulation of cellular metabolic process; GO:0031326 regulation of cellular biosynthetic process; GO:0050789 regulation of biological process; GO:0050794 regulat…	GO:0005622 intracellular; GO:0005623 cell; GO:0005737 cytoplasm; GO:0005829 cytosol;	GO:0003676 nucleic acid binding; GO:0003677 DNA binding; GO:0005488 binding; GO:0097159 organic cyclic compound binding; GO:1901363 heterocyclic compound binding;	PF00216	Bacterial DNA-binding protein	L	COG0776	Bacterial nucleoid DNA-binding protein
Q5HKK1	Phosphoenolpyruvate--glycerone phosphotransferase OS=Staphylococcus epidermidis (strain ATCC 35984 / RP62A) OX=176279 GN=SERP2343 PE=4 SV=1	SERP2343	0.809	0.000339134	Down	13.24	33.1	3	3	70	1.148	0.897	0.893	0.896	1.094	1.08	Cytoplasmic	K05881	dhaM; phosphoenolpyruvate---glycerone phosphotransferase subunit DhaM [EC:2.7.1.121]	map00561 Glycerolipid metabolism; map01100 Metabolic pathways	GO:0006793 phosphorus metabolic process; GO:0006796 phosphate-containing compound metabolic process; GO:0008152 metabolic process; GO:0009987 cellular process; GO:0016310 phosphorylation; GO:0044237 cellular metabolic process;		GO:0003824 catalytic activity; GO:0016301 kinase activity; GO:0016740 transferase activity; GO:0016772 transferase activity, transferring phosphorus-containing groups; GO:0016773 phosphotransferase activity, alcohol group as acceptor; GO:0047324 phosphoenolpyruvate-glycerone phosphotransferase activity;			S	COG3412	Uncharacterized protein conserved in bacteria
A0A0N9S850	Uncharacterized protein OS=Staphylococcus phage SPbeta-like OX=1732063 GN=SPbetalike_00005 PE=4 SV=1	SPbetalike_00005	1.245	0.0290307	Up	20.984	4	1	1	1	0.86	1.076	1.194	1.043	0.822	0.978	Cytoplasmic
Q8CTS8	30S ribosomal protein S12 OS=Staphylococcus epidermidis (strain ATCC 12228 / FDA PCI 1200) OX=176280 GN=rpsL PE=3 SV=1	rpsL	0.832	0.000175855	Down	15.344	53.3	6	6	31	1.09	0.92	0.926	0.889	1.09	1.107	Cytoplasmic	K02950	RP-S12, MRPS12, rpsL; small subunit ribosomal protein S12	map03010 Ribosome	GO:0006412 translation; GO:0006518 peptide metabolic process; GO:0006807 nitrogen compound metabolic process; GO:0008152 metabolic process; GO:0009058 biosynthetic process; GO:0009059 macromolecule biosynthetic process; GO:0009987 cellular process; GO:0010467 gene expression; GO:0019538 protein metabolic process; GO:0034641 cellular nitrogen compound metabolic process; GO:0034645 cellular macromo…	GO:0005622 intracellular; GO:0005623 cell; GO:0005737 cytoplasm; GO:0005840 ribosome; GO:0032991 protein-containing complex; GO:0043226 organelle; GO:0043228 non-membrane-bounded organelle; GO:0043229 intracellular organelle; GO:0043232 intracellular non-membrane-bounded organelle; GO:1990904 ribonucleoprotein complex;	GO:0003735 structural constituent of ribosome; GO:0005198 structural molecule activity;			J	COG0048	Ribosomal protein S12
A0A7G9EBB7	General stress protein OS=Staphylococcus epidermidis OX=1282 GN=ATM22_02375 PE=4 SV=1	ATM22_02375	1.324	0.00037485	Up	16.114	44.3	5	1	15	0.859	1.125	1.178	1.099	0.833	0.877	Unknown									S	COG3871	Uncharacterized stress protein (general stress protein 26)
Q8CRH4	30S ribosomal protein S8 OS=Staphylococcus epidermidis (strain ATCC 12228 / FDA PCI 1200) OX=176280 GN=rpsH PE=3 SV=1	rpsH	1.711	0.0164009	Up	14.825	62.1	10	1	66	0.643	1.254	1.506	1.011	0.762	0.799	Cytoplasmic	K02994	RP-S8, rpsH; small subunit ribosomal protein S8	map03010 Ribosome	GO:0000028 ribosomal small subunit assembly; GO:0006412 translation; GO:0006518 peptide metabolic process; GO:0006807 nitrogen compound metabolic process; GO:0006996 organelle organization; GO:0008152 metabolic process; GO:0009058 biosynthetic process; GO:0009059 macromolecule biosynthetic process; GO:0009894 regulation of catabolic process; GO:0009987 cellular process; GO:0010467 gene expression…	GO:0005622 intracellular; GO:0005623 cell; GO:0005737 cytoplasm; GO:0005829 cytosol; GO:0005840 ribosome; GO:0015935 small ribosomal subunit; GO:0022626 cytosolic ribosome; GO:0022627 cytosolic small ribosomal subunit; GO:0032991 protein-containing complex; GO:0043226 organelle; GO:0043228 non-membrane-bounded organelle; GO:0043229 intracellular organelle; GO:0043232 intracellular non-membrane-bo…	GO:0003676 nucleic acid binding; GO:0003723 RNA binding; GO:0003735 structural constituent of ribosome; GO:0005198 structural molecule activity; GO:0005488 binding; GO:0019843 rRNA binding; GO:0097159 organic cyclic compound binding; GO:1901363 heterocyclic compound binding;	PF00410	Ribosomal protein S8	J	COG0096	Ribosomal protein S8
Q5HQN5	Uncharacterized protein OS=Staphylococcus epidermidis (strain ATCC 35984 / RP62A) OX=176279 GN=SERP0513 PE=4 SV=1	SERP0513	1.31	0.0153092	Up	10.237	28.4	2	2	4	0.921	1.12	1.031	1.154	0.847	0.754	Cytoplasmic
D3JCW0	Cassette chromosome recombinase B1 OS=Staphylococcus aureus OX=1280 GN=ccrB1 PE=4 SV=1	ccrB1	0.777	0.00179288	Down	62.401	1.8	1	1	1	1.165	0.902	0.916	0.833	1.099	1.146	Unknown	K06400	spoIVCA; site-specific DNA recombinase					PF00239; PF07508	Resolvase, N terminal domain; Recombinase	L	COG1961	Site-specific recombinases, DNA invertase Pin homologs
A0A7I0ALS3	Ferritin OS=Staphylococcus epidermidis OX=1282 GN=ftnA PE=3 SV=1	ftnA	0.733	0.00145685	Down	19.483	46.7	9	9	69	1.16	0.893	0.893	0.799	1.156	1.211	Cytoplasmic	K02217	ftnA, ftn; ferritin [EC:1.16.3.2]		GO:0006873 cellular ion homeostasis; GO:0006875 cellular metal ion homeostasis; GO:0006879 cellular iron ion homeostasis; GO:0006880 intracellular sequestering of iron ion; GO:0009987 cellular process; GO:0019725 cellular homeostasis; GO:0030003 cellular cation homeostasis; GO:0042592 homeostatic process; GO:0046916 cellular transition metal ion homeostasis; GO:0048878 chemical homeostasis; GO:00…	GO:0005622 intracellular; GO:0005623 cell; GO:0005737 cytoplasm;	GO:0005488 binding; GO:0005506 iron ion binding; GO:0043167 ion binding; GO:0043169 cation binding; GO:0046872 metal ion binding; GO:0046914 transition metal ion binding;	PF00210	Ferritin-like domain	P	COG1528	Ferritin-like protein
A0A0E1VHI2	Isochorismatase family protein OS=Staphylococcus epidermidis W23144 OX=525376 GN=HMPREF0791_0281 PE=4 SV=1	HMPREF0791_0281	0.804	0.00871798	Down	83.821	46.6	30	5	163	1.15	0.85	0.905	0.953	1.165	1.054	Cytoplasmic				GO:0006139 nucleobase-containing compound metabolic process; GO:0006206 pyrimidine nucleobase metabolic process; GO:0006208 pyrimidine nucleobase catabolic process; GO:0006212 uracil catabolic process; GO:0006725 cellular aromatic compound metabolic process; GO:0006807 nitrogen compound metabolic process; GO:0008152 metabolic process; GO:0009056 catabolic process; GO:0009112 nucleobase metabolic …	GO:0005622 intracellular; GO:0005623 cell; GO:0005737 cytoplasm;				Q	COG1335	Amidases related to nicotinamidase
D4FN88	Putative hemin transport system permease protein HrtB OS=Staphylococcus epidermidis M23864:W2(grey) OX=525375 GN=HMPREF0794_2026 PE=3 SV=1	HMPREF0794_2026	0.825	0.00181903	Down	108.61	7.6	8	6	9	1.109	0.89	0.895	0.964	1.122	1.102	CytoplasmicMembrane	K19080	vraG; cationic antimicrobial peptide transport system permease protein	map01503 Cationic antimicrobial peptide (CAMP) resistance; map02010 ABC transporters; map02020 Two-component system; map05150 Staphylococcus aureus infection						V	COG0577	ABC-type antimicrobial peptide transport system, permease component
Q5HFX7	UPF0398 protein SACOL1485 OS=Staphylococcus aureus (strain COL) OX=93062 GN=SACOL1485 PE=3 SV=1	SACOL1485	1.724	0.0493132	Up	22.191	7.5	1	1	1	0.616	1.286	1.564	0.895	0.701	0.855	Cytoplasmic									S	COG4474	Uncharacterized protein conserved in bacteria
Q5HR66	DUF402 domain-containing protein OS=Staphylococcus epidermidis (strain ATCC 35984 / RP62A) OX=176279 GN=SERP0327 PE=4 SV=1	SERP0327	0.825	0.0367984	Down	23.697	26.9	5	1	9	1.134	0.9	0.838	1.002	1.155	1.031	Cytoplasmic	K09145	K09145; uncharacterized protein							S	COG2306	Uncharacterized conserved protein
A0A0E1VBF9	Thioredoxin domain-containing protein OS=Staphylococcus epidermidis W23144 OX=525376 GN=HMPREF0791_2214 PE=4 SV=1	HMPREF0791_2214	0.822	0.00403702	Down	12.665	37	3	1	6	1.068	0.91	0.924	0.894	1.073	1.176	Cytoplasmic							PF00085	Thioredoxin	CO	COG0526	Thiol-disulfide isomerase and thioredoxins
Q8CPP4	Bifunctional protein FolD OS=Staphylococcus epidermidis (strain ATCC 12228 / FDA PCI 1200) OX=176280 GN=folD PE=3 SV=1	folD	0.816	0.0355593	Down	31.001	75.9	18	1	83	1.148	0.881	0.822	1.02	1.116	1.074	Cytoplasmic	K01491	folD; methylenetetrahydrofolate dehydrogenase (NADP+) / methenyltetrahydrofolate cyclohydrolase [EC:1.5.1.5 3.5.4.9]	map00670 One carbon pool by folate; map00720 Carbon fixation pathways in prokaryotes; map01100 Metabolic pathways; map01120 Microbial metabolism in diverse environments; map01200 Carbon metabolism	GO:0006730 one-carbon metabolic process; GO:0008152 metabolic process; GO:0009987 cellular process; GO:0044237 cellular metabolic process; GO:0044281 small molecule metabolic process; GO:0055114 oxidation-reduction process;	GO:0005622 intracellular; GO:0005623 cell; GO:0005737 cytoplasm; GO:0005829 cytosol;	GO:0003824 catalytic activity; GO:0004477 methenyltetrahydrofolate cyclohydrolase activity; GO:0004488 methylenetetrahydrofolate dehydrogenase (NADP+) activity; GO:0016491 oxidoreductase activity; GO:0016645 oxidoreductase activity, acting on the CH-NH group of donors; GO:0016646 oxidoreductase activity, acting on the CH-NH group of donors, NAD or NADP as acceptor; GO:0016787 hydrolase activity; …	PF00763; PF02882	Tetrahydrofolate dehydrogenase/cyclohydrolase, catalytic domain; Tetrahydrofolate dehydrogenase/cyclohydrolase, NAD(P)-binding domain	F	COG0190	5,10-methylene-tetrahydrofolate dehydrogenase/Methenyl tetrahydrofolate cyclohydrolase
A0A4Y4YQC1	Uncharacterized protein OS=Staphylococcus epidermidis OX=1282 GN=CP553_10180 PE=4 SV=1	CP553_10180	0.496	0.00574134	Down	18.859	40.2	10	1	67	1.212	0.728	0.762	0.52	1.389	1.454	Unknown
A0A7I0BEW5	Acetolactate synthase AlsS OS=Staphylococcus epidermidis OX=1282 GN=alsS PE=3 SV=1	alsS	0.772	0.0281722	Down	60.918	69.7	29	1	214	1.172	0.864	0.776	1.005	1.162	1.091	CytoplasmicMembrane	K01652	E2.2.1.6L, ilvB, ilvG, ilvI; acetolactate synthase I/II/III large subunit [EC:2.2.1.6]	map00290 Valine, leucine and isoleucine biosynthesis; map00650 Butanoate metabolism; map00660 C5-Branched dibasic acid metabolism; map00770 Pantothenate and CoA biosynthesis; map01100 Metabolic pathways; map01110 Biosynthesis of secondary metabolites; map01130 Biosynthesis of antibiotics; map01210 2-Oxocarboxylic acid metabolism; map01230 Biosynthesis of amino acids				PF02776; PF00205; PF02775	Thiamine pyrophosphate enzyme, N-terminal TPP binding domain; Thiamine pyrophosphate enzyme, central domain; Thiamine pyrophosphate enzyme, C-terminal TPP binding domain	EH	COG0028	Thiamine pyrophosphate-requiring enzymes [acetolactate synthase, pyruvate dehydrogenase (cytochrome), glyoxylate carboligase, phosphonopyruvate decarboxylase]
A0A7I0B5B8	Peptide methionine sulfoxide reductase MsrA OS=Staphylococcus epidermidis OX=1282 GN=msrA PE=3 SV=1	msrA	0.777	0.0415899	Down	19.806	56.1	7	7	11	1.166	0.856	0.75	0.972	1.14	1.013	Unknown	K07304	msrA; peptide-methionine (S)-S-oxide reductase [EC:1.8.4.11]							O	COG0225	Peptide methionine sulfoxide reductase
Q5HL67	Secretory antigen SsaA-related protein OS=Staphylococcus epidermidis (strain ATCC 35984 / RP62A) OX=176279 GN=SERP2120 PE=4 SV=1	SERP2120	0.486	0.00231449	Down	16.632	28.7	4	4	7	1.552	0.676	0.587	0.76	1.408	1.206	Extracellular							PF05257	CHAP domain	S	COG3942	Surface antigen
Q8CQD2	Diacetyl reductase [(S)-acetoin forming] OS=Staphylococcus epidermidis (strain ATCC 12228 / FDA PCI 1200) OX=176280 GN=butA PE=3 SV=1	butA	1.206	0.00026524	Up	27.917	44.4	7	7	28	0.913	1.07	1.086	1.123	0.896	0.91	Cytoplasmic	K03366	butA, budC; meso-butanediol dehydrogenase / (S,S)-butanediol dehydrogenase / diacetyl reductase [EC:1.1.1.- 1.1.1.76 1.1.1.304]	map00650 Butanoate metabolism				PF13561	Enoyl-(Acyl carrier protein) reductase	IQ	COG1028	Dehydrogenases with different specificities (related to short-chain alcohol dehydrogenases)
A0A0H2VHY0	Nitrite reductase OS=Staphylococcus epidermidis (strain ATCC 12228 / FDA PCI 1200) OX=176280 GN=SE_1978 PE=4 SV=1	SE_1978	2.73	0.00034572	Up	89.124	51.9	37	1	96	0.466	1.565	1.474	1.253	0.54	0.566	Cytoplasmic	K00362	nirB; nitrite reductase (NADH) large subunit [EC:1.7.1.15]	map00910 Nitrogen metabolism; map01100 Metabolic pathways; map01120 Microbial metabolism in diverse environments				PF07992; PF04324	Pyridine nucleotide-disulphide oxidoreductase; BFD-like [2Fe-2S] binding domain	C	COG1251	NAD(P)H-nitrite reductase
Q5HRU7	Trans-sulfuration enzyme family protein OS=Staphylococcus epidermidis (strain ATCC 35984 / RP62A) OX=176279 GN=SERP0095 PE=3 SV=1	SERP0095	1.275	0.000136616	Up	41.862	24.4	7	7	15	0.889	1.137	1.108	1.103	0.886	0.851	Cytoplasmic	K17217	mccB; cystathionine gamma-lyase / homocysteine desulfhydrase [EC:4.4.1.1 4.4.1.2]	map00260 Glycine, serine and threonine metabolism; map00270 Cysteine and methionine metabolism; map00920 Sulfur metabolism; map01100 Metabolic pathways; map01130 Biosynthesis of antibiotics; map01230 Biosynthesis of amino acids	GO:0000096 sulfur amino acid metabolic process; GO:0000098 sulfur amino acid catabolic process; GO:0006082 organic acid metabolic process; GO:0006520 cellular amino acid metabolic process; GO:0006790 sulfur compound metabolic process; GO:0006807 nitrogen compound metabolic process; GO:0008152 metabolic process; GO:0008284 positive regulation of cell population proliferation; GO:0009056 catabolic …		GO:0003824 catalytic activity; GO:0003962 cystathionine gamma-synthase activity; GO:0004123 cystathionine gamma-lyase activity; GO:0016740 transferase activity; GO:0016765 transferase activity, transferring alkyl or aryl (other than methyl) groups; GO:0016829 lyase activity; GO:0016846 carbon-sulfur lyase activity;	PF01053	Cys/Met metabolism PLP-dependent enzyme	E	COG0626	Cystathionine beta-lyases/cystathionine gamma-synthases
Q5HHD1	Putative peptidyl-prolyl cis-trans isomerase OS=Staphylococcus aureus (strain COL) OX=93062 GN=SACOL0957 PE=3 SV=1	SACOL0957	0.824	0.0237879	Down	21.649	25.4	4	2	11	1.203	0.896	0.991	0.937	1.182	1.041	Cytoplasmic	K03768	PPIB, ppiB; peptidyl-prolyl cis-trans isomerase B (cyclophilin B) [EC:5.2.1.8]		GO:0000413 protein peptidyl-prolyl isomerization; GO:0006464 cellular protein modification process; GO:0006807 nitrogen compound metabolic process; GO:0008152 metabolic process; GO:0009987 cellular process; GO:0018193 peptidyl-amino acid modification; GO:0018208 peptidyl-proline modification; GO:0019538 protein metabolic process; GO:0036211 protein modification process; GO:0043170 macromolecule m…		GO:0003755 peptidyl-prolyl cis-trans isomerase activity; GO:0003824 catalytic activity; GO:0016853 isomerase activity; GO:0016859 cis-trans isomerase activity; GO:0140096 catalytic activity, acting on a protein;	PF00160	Cyclophilin type peptidyl-prolyl cis-trans isomerase/CLD	O	COG0652	Peptidyl-prolyl cis-trans isomerase (rotamase) - cyclophilin family
Q5HDX2	30S ribosomal protein S8 OS=Staphylococcus aureus (strain COL) OX=93062 GN=rpsH PE=3 SV=1	rpsH	1.74	0.029139	Up	14.831	60.6	10	1	68	0.64	1.286	1.557	0.946	0.717	0.82	Cytoplasmic	K02994	RP-S8, rpsH; small subunit ribosomal protein S8	map03010 Ribosome	GO:0000028 ribosomal small subunit assembly; GO:0006412 translation; GO:0006518 peptide metabolic process; GO:0006807 nitrogen compound metabolic process; GO:0006996 organelle organization; GO:0008152 metabolic process; GO:0009058 biosynthetic process; GO:0009059 macromolecule biosynthetic process; GO:0009894 regulation of catabolic process; GO:0009987 cellular process; GO:0010467 gene expression…	GO:0005622 intracellular; GO:0005623 cell; GO:0005737 cytoplasm; GO:0005829 cytosol; GO:0005840 ribosome; GO:0015935 small ribosomal subunit; GO:0022626 cytosolic ribosome; GO:0022627 cytosolic small ribosomal subunit; GO:0032991 protein-containing complex; GO:0043226 organelle; GO:0043228 non-membrane-bounded organelle; GO:0043229 intracellular organelle; GO:0043232 intracellular non-membrane-bo…	GO:0003676 nucleic acid binding; GO:0003723 RNA binding; GO:0003735 structural constituent of ribosome; GO:0005198 structural molecule activity; GO:0005488 binding; GO:0019843 rRNA binding; GO:0097159 organic cyclic compound binding; GO:1901363 heterocyclic compound binding;	PF00410	Ribosomal protein S8	J	COG0096	Ribosomal protein S8
Q5HM64	Iron-sulfur cluster carrier protein OS=Staphylococcus epidermidis (strain ATCC 35984 / RP62A) OX=176279 GN=SERP1765 PE=3 SV=1	SERP1765	0.669	0.000258246	Down	83.984	43.7	33	32	92	1.169	0.757	0.832	0.815	1.191	1.236	CytoplasmicMembrane	K03593	mrp, NUBPL; ATP-binding protein involved in chromosome partitioning		GO:0006355 regulation of transcription, DNA-templated; GO:0009889 regulation of biosynthetic process; GO:0009890 negative regulation of biosynthetic process; GO:0009892 negative regulation of metabolic process; GO:0010468 regulation of gene expression; GO:0010556 regulation of macromolecule biosynthetic process; GO:0010558 negative regulation of macromolecule biosynthetic process; GO:0010605 nega…					D	COG0489	ATPases involved in chromosome partitioning
Q8CSU3	DNA topoisomerase 1 OS=Staphylococcus epidermidis (strain ATCC 12228 / FDA PCI 1200) OX=176280 GN=topA PE=3 SV=1	topA	0.833	0.0498026	Down	79.518	46.9	29	1	61	1.126	0.881	0.839	1.033	1.128	1.051	Cytoplasmic	K03168	topA; DNA topoisomerase I [EC:5.6.2.1]							L	COG0550	Topoisomerase IA
D4FMU1	Protein VraX OS=Staphylococcus epidermidis M23864:W2(grey) OX=525375 GN=HMPREF0794_1879 PE=4 SV=1	HMPREF0794_1879	0.612	0.000795924	Down	7.1181	35.6	2	2	5	1.291	0.829	0.698	0.792	1.274	1.223	Extracellular
A0A0H2WZR9	Uncharacterized protein OS=Staphylococcus aureus (strain COL) OX=93062 GN=SACOL0075 PE=4 SV=1	SACOL0075	1.713	0.00496835	Up	22.662	6.5	1	1	2	0.691	1.259	1.432	1.054	0.721	0.774	CytoplasmicMembrane
A0A7G9EBT7	NADP-dependent oxidoreductase OS=Staphylococcus epidermidis OX=1282 GN=ATM22_03245 PE=4 SV=1	ATM22_03245	1.216	0.0180559	Up	36.939	60.2	20	1	65	0.932	1.096	1.04	1.148	0.826	0.942	Cytoplasmic	K00359	qorA; NADPH:quinone reductase [EC:1.6.5.5]							S	COG2130	Putative NADP-dependent oxidoreductases
A0A7G9EEN1	Bifunctional autolysin OS=Staphylococcus epidermidis OX=1282 GN=ATM22_08570 PE=3 SV=1	ATM22_08570	0.681	0.000514675	Down	148.15	52.7	54	1	280	1.206	0.847	0.85	0.769	1.246	1.169	Extracellular	K13714	atl; bifunctional autolysin [EC:3.5.1.28 3.2.1.96]					PF13457; PF01832	SH3-like domain; Mannosyl-glycoprotein endo-beta-N-acetylglucosaminidase	M	COG5632	N-acetylmuramoyl-L-alanine amidase
Q8CPY5	Glyceraldehyde-3-phosphate dehydrogenase 1 OS=Staphylococcus epidermidis (strain ATCC 12228 / FDA PCI 1200) OX=176280 GN=gapA1 PE=3 SV=1	gapA1	1.368	0.0187591	Up	36.19	92	30	1	704	0.78	0.968	1.012	1.245	0.818	0.759	Cytoplasmic	K00134	GAPDH, gapA; glyceraldehyde 3-phosphate dehydrogenase [EC:1.2.1.12]	map00010 Glycolysis / Gluconeogenesis; map00710 Carbon fixation in photosynthetic organisms; map01100 Metabolic pathways; map01110 Biosynthesis of secondary metabolites; map01120 Microbial metabolism in diverse environments; map01130 Biosynthesis of antibiotics; map01200 Carbon metabolism; map01230 Biosynthesis of amino acids; map05130 Pathogenic Escherichia coli infection	GO:0006139 nucleobase-containing compound metabolic process; GO:0006725 cellular aromatic compound metabolic process; GO:0006732 coenzyme metabolic process; GO:0006733 oxidoreduction coenzyme metabolic process; GO:0006734 NADH metabolic process; GO:0006735 NADH regeneration; GO:0006753 nucleoside phosphate metabolic process; GO:0006793 phosphorus metabolic process; GO:0006796 phosphate-containing…	GO:0005622 intracellular; GO:0005623 cell; GO:0005737 cytoplasm; GO:0009986 cell surface;	GO:0000166 nucleotide binding; GO:0002020 protease binding; GO:0003824 catalytic activity; GO:0004365 glyceraldehyde-3-phosphate dehydrogenase (NAD+) (phosphorylating) activity; GO:0005488 binding; GO:0005515 protein binding; GO:0016491 oxidoreductase activity; GO:0016620 oxidoreductase activity, acting on the aldehyde or oxo group of donors, NAD or NADP as acceptor; GO:0016903 oxidoreductase act…	PF00044; PF02800	Glyceraldehyde 3-phosphate dehydrogenase, NAD binding domain; Glyceraldehyde 3-phosphate dehydrogenase, C-terminal domain	G	COG0057	Glyceraldehyde-3-phosphate dehydrogenase/erythrose-4-phosphate dehydrogenase
A0A0H2VIY4	DNA-directed DNA polymerase OS=Staphylococcus epidermidis (strain ATCC 12228 / FDA PCI 1200) OX=176280 GN=SE_p301 PE=4 SV=1	SE_p301	1.207	6.54838e-05	Up	127.3	37.2	32	32	42	0.894	1.104	1.073	1.084	0.894	0.913	Cytoplasmic
Q5HCU1	Oxygen-dependent choline dehydrogenase OS=Staphylococcus aureus (strain COL) OX=93062 GN=betA PE=3 SV=1	betA	0.446	0.00168475	Down	132.23	9.6	11	2	98	1.524	0.611	0.533	0.756	1.398	1.337	CytoplasmicMembrane	K00108	betA, CHDH; choline dehydrogenase [EC:1.1.99.1]	map00260 Glycine, serine and threonine metabolism; map01100 Metabolic pathways				PF00732; PF05199	GMC oxidoreductase; GMC oxidoreductase	E	COG2303	Choline dehydrogenase and related flavoproteins
Q8CTA4	Probable cysteine desulfurase OS=Staphylococcus epidermidis (strain ATCC 12228 / FDA PCI 1200) OX=176280 GN=csd PE=3 SV=1	csd	0.759	0.0259462	Down	46.02	32.2	12	2	41	1.255	0.845	0.815	0.976	1.186	1.033	Cytoplasmic	K11717	sufS; cysteine desulfurase / selenocysteine lyase [EC:2.8.1.7 4.4.1.16]	map00450 Selenocompound metabolism; map01100 Metabolic pathways				PF00266	Aminotransferase class-V	E	COG0520	Selenocysteine lyase
A0A7H5CAV2	Inositol monophosphatase family protein OS=Staphylococcus epidermidis OX=1282 GN=F9B71_03625 PE=4 SV=1	F9B71_03625	0.703	0.00445482	Down	30.668	42.5	12	1	39	1.193	0.85	0.744	0.916	1.169	1.207	Unknown	K01092	E3.1.3.25, IMPA, suhB; myo-inositol-1(or 4)-monophosphatase [EC:3.1.3.25]	map00521 Streptomycin biosynthesis; map00562 Inositol phosphate metabolism; map01100 Metabolic pathways; map01130 Biosynthesis of antibiotics						G	COG0483	Archaeal fructose-1,6-bisphosphatase and related enzymes of inositol monophosphatase family
Q8CMT6	Cysteine synthase OS=Staphylococcus epidermidis (strain ATCC 12228 / FDA PCI 1200) OX=176280 GN=cysK PE=3 SV=1	cysK	1.257	0.000459849	Up	33.151	85.8	17	17	133	0.844	1.104	1.115	1.099	0.888	0.907	Cytoplasmic	K01738	cysK; cysteine synthase [EC:2.5.1.47]	map00270 Cysteine and methionine metabolism; map00920 Sulfur metabolism; map01100 Metabolic pathways; map01110 Biosynthesis of secondary metabolites; map01120 Microbial metabolism in diverse environments; map01130 Biosynthesis of antibiotics; map01200 Carbon metabolism; map01230 Biosynthesis of amino acids	GO:0000096 sulfur amino acid metabolic process; GO:0000097 sulfur amino acid biosynthetic process; GO:0000098 sulfur amino acid catabolic process; GO:0006082 organic acid metabolic process; GO:0006520 cellular amino acid metabolic process; GO:0006534 cysteine metabolic process; GO:0006535 cysteine biosynthetic process from serine; GO:0006555 methionine metabolic process; GO:0006563 L-serine metab…	GO:0005622 intracellular; GO:0005623 cell; GO:0005737 cytoplasm; GO:0032991 protein-containing complex; GO:0032993 protein-DNA complex;	GO:0003824 catalytic activity; GO:0004122 cystathionine beta-synthase activity; GO:0004124 cysteine synthase activity; GO:0005488 binding; GO:0005515 protein binding; GO:0008134 transcription factor binding; GO:0008144 drug binding; GO:0016740 transferase activity; GO:0016765 transferase activity, transferring alkyl or aryl (other than methyl) groups; GO:0016829 lyase activity; GO:0016835 carbon-…			E	COG0031	Cysteine synthase
D4FNE0	7-carboxy-7-deazaguanine synthase OS=Staphylococcus epidermidis M23864:W2(grey) OX=525375 GN=queE PE=3 SV=1	queE	1.36	0.00441196	Up	27.04	40.9	6	6	9	0.875	1.123	1.049	1.226	0.828	0.796	Cytoplasmic	K10026	queE; 7-carboxy-7-deazaguanine synthase [EC:4.3.99.3]	map00790 Folate biosynthesis; map01100 Metabolic pathways			GO:0000287 magnesium ion binding; GO:0003824 catalytic activity; GO:0005488 binding; GO:0005515 protein binding; GO:0008144 drug binding; GO:0016829 lyase activity; GO:0016840 carbon-nitrogen lyase activity; GO:0042802 identical protein binding; GO:0042803 protein homodimerization activity; GO:0043167 ion binding; GO:0043169 cation binding; GO:0046872 metal ion binding; GO:0046983 protein dimeriz…	PF13353; PF04055	4Fe-4S single cluster domain; Radical SAM superfamily	H	COG0602	Organic radical activating enzymes
Q8CSW3	DNA-directed RNA polymerase subunit omega OS=Staphylococcus epidermidis (strain ATCC 12228 / FDA PCI 1200) OX=176280 GN=rpoZ PE=3 SV=1	rpoZ	1.244	0.00132493	Up	7.7909	40	4	4	15	0.878	1.129	1.148	1.1	0.887	0.949	Unknown	K03060	rpoZ; DNA-directed RNA polymerase subunit omega [EC:2.7.7.6]	map03020 RNA polymerase	GO:0006139 nucleobase-containing compound metabolic process; GO:0006351 transcription, DNA-templated; GO:0006725 cellular aromatic compound metabolic process; GO:0006807 nitrogen compound metabolic process; GO:0008152 metabolic process; GO:0009058 biosynthetic process; GO:0009059 macromolecule biosynthetic process; GO:0009987 cellular process; GO:0010467 gene expression; GO:0016070 RNA metabolic …	GO:0005618 cell wall; GO:0005622 intracellular; GO:0005623 cell; GO:0005737 cytoplasm; GO:0005829 cytosol; GO:0030312 external encapsulating structure; GO:0030880 RNA polymerase complex; GO:0032991 protein-containing complex; GO:0061695 transferase complex, transferring phosphorus-containing groups; GO:0071944 cell periphery; GO:1902494 catalytic complex; GO:1990234 transferase complex;	GO:0003824 catalytic activity; GO:0003899 DNA-directed 5'-3' RNA polymerase activity; GO:0016740 transferase activity; GO:0016772 transferase activity, transferring phosphorus-containing groups; GO:0016779 nucleotidyltransferase activity; GO:0034062 5'-3' RNA polymerase activity; GO:0097747 RNA polymerase activity; GO:0140098 catalytic activity, acting on RNA;			K	COG1758	DNA-directed RNA polymerase, subunit K/omega
Q5HPB2	DegV family protein OS=Staphylococcus epidermidis (strain ATCC 35984 / RP62A) OX=176279 GN=SERP1001 PE=4 SV=1	SERP1001	0.643	0.0373677	Down	31.226	36.2	7	1	13	1.364	0.802	0.618	0.962	1.274	1.068	Unknown									S	COG1307	Uncharacterized protein conserved in bacteria
Q8CPT5	Chaperone protein ClpB OS=Staphylococcus epidermidis (strain ATCC 12228 / FDA PCI 1200) OX=176280 GN=clpB PE=3 SV=1	clpB	1.353	4.34429e-06	Up	98.186	53	41	20	114	0.833	1.132	1.139	1.152	0.843	0.854	Cytoplasmic	K03695	clpB; ATP-dependent Clp protease ATP-binding subunit ClpB		GO:0006508 proteolysis; GO:0006807 nitrogen compound metabolic process; GO:0008152 metabolic process; GO:0019538 protein metabolic process; GO:0043170 macromolecule metabolic process; GO:0044238 primary metabolic process; GO:0071704 organic substance metabolic process; GO:1901564 organonitrogen compound metabolic process;		GO:0005488 binding; GO:0005515 protein binding; GO:0042802 identical protein binding;	PF00004; PF07724; PF10431	ATPase family associated with various cellular activities (AAA); AAA domain (Cdc48 subfamily); C-terminal, D2-small domain, of ClpB protein	O	COG0542	ATPases with chaperone activity, ATP-binding subunit
Q5HIC3	Ribulokinase OS=Staphylococcus aureus (strain COL) OX=93062 GN=araB PE=3 SV=1	araB	0.825	0.000280364	Down	61.01	3.5	2	2	3	1.111	0.933	0.917	0.885	1.11	1.096	Cytoplasmic	K00853	araB; L-ribulokinase [EC:2.7.1.16]	map00040 Pentose and glucuronate interconversions; map01100 Metabolic pathways	GO:0005975 carbohydrate metabolic process; GO:0005996 monosaccharide metabolic process; GO:0006793 phosphorus metabolic process; GO:0006796 phosphate-containing compound metabolic process; GO:0008152 metabolic process; GO:0009056 catabolic process; GO:0009058 biosynthetic process; GO:0009987 cellular process; GO:0016052 carbohydrate catabolic process; GO:0016310 phosphorylation; GO:0019321 pentos…	GO:0005622 intracellular; GO:0005623 cell; GO:0005737 cytoplasm;	GO:0003824 catalytic activity; GO:0008741 ribulokinase activity; GO:0016301 kinase activity; GO:0016740 transferase activity; GO:0016772 transferase activity, transferring phosphorus-containing groups; GO:0016773 phosphotransferase activity, alcohol group as acceptor; GO:0019200 carbohydrate kinase activity;	PF00370; PF02782	FGGY family of carbohydrate kinases, N-terminal domain; FGGY family of carbohydrate kinases, C-terminal domain	F	COG1069	Ribulose kinase
A0A7H5C413	Uncharacterized protein OS=Staphylococcus epidermidis OX=1282 GN=F9B71_12285 PE=4 SV=1	F9B71_12285	0.508	0.00310267	Down	15.931	42.1	7	7	16	1.488	0.692	0.576	0.787	1.332	1.223	Unknown
A0A7I0ALQ9	MOSC domain-containing protein OS=Staphylococcus epidermidis OX=1282 GN=E1N03_04495 PE=4 SV=1	E1N03_04495	0.675	0.0212455	Down	26.464	26.1	5	5	6	1.252	0.808	0.684	0.966	1.277	1.11	Cytoplasmic							PF03473	MOSC domain	S	COG2258	Uncharacterized protein conserved in bacteria
Q8CQC2	Probable succinyl-diaminopimelate desuccinylase OS=Staphylococcus epidermidis (strain ATCC 12228 / FDA PCI 1200) OX=176280 GN=dapE PE=3 SV=1	dapE	0.664	0.000271428	Down	44.972	11.6	5	5	6	1.29	0.81	0.79	0.826	1.208	1.158	Cytoplasmic	K01439	dapE; succinyl-diaminopimelate desuccinylase [EC:3.5.1.18]	map00300 Lysine biosynthesis; map01100 Metabolic pathways; map01120 Microbial metabolism in diverse environments; map01230 Biosynthesis of amino acids				PF07687	Peptidase dimerisation domain	E	COG0624	Acetylornithine deacetylase/Succinyl-diaminopimelate desuccinylase and related deacylases
Q5HN01	Uncharacterized protein OS=Staphylococcus epidermidis (strain ATCC 35984 / RP62A) OX=176279 GN=SERP1474 PE=4 SV=1	SERP1474	0.697	0.0401833	Down	111.1	25.3	22	3	40	1.294	0.812	0.68	1.011	1.198	1.098	CytoplasmicMembrane	K01992	ABC-2.P; ABC-2 type transport system permease protein
A0A7G9EFF2	Aldehyde-alcohol dehydrogenase OS=Staphylococcus epidermidis OX=1282 GN=ATM22_09975 PE=3 SV=1	ATM22_09975	0.712	0.0071974	Down	95.605	55.2	41	1	282	1.227	0.782	0.814	0.936	1.235	1.093	Cytoplasmic	K04072	adhE; acetaldehyde dehydrogenase / alcohol dehydrogenase [EC:1.2.1.10 1.1.1.1]	map00010 Glycolysis / Gluconeogenesis; map00071 Fatty acid degradation; map00350 Tyrosine metabolism; map00620 Pyruvate metabolism; map00625 Chloroalkane and chloroalkene degradation; map00626 Naphthalene degradation; map00650 Butanoate metabolism; map01100 Metabolic pathways; map01110 Biosynthesis of secondary metabolites; map01120 Microbial metabolism in diverse environments; map01130 Biosynthe…						C	COG1454	Alcohol dehydrogenase, class IV
Q8CN75	Oxygen regulatory protein NreC OS=Staphylococcus epidermidis (strain ATCC 12228 / FDA PCI 1200) OX=176280 GN=nreC PE=3 SV=1	nreC	1.319	7.36685e-05	Up	24.517	37.2	6	6	10	0.848	1.166	1.111	1.118	0.859	0.867	Cytoplasmic	K07696	nreC; two-component system, NarL family, response regulator NreC	map02020 Two-component system				PF00072; PF00196	Response regulator receiver domain; Bacterial regulatory proteins, luxR family	K	COG2197	Response regulator containing a CheY-like receiver domain and an HTH DNA-binding domain
A0A0H2VIT6	Streptococcal hemagglutinin protein OS=Staphylococcus epidermidis (strain ATCC 12228 / FDA PCI 1200) OX=176280 GN=SE_2249 PE=4 SV=1	SE_2249	0.721	0.00712657	Down	294.64	14.4	30	2	109	1.244	0.871	0.76	0.932	1.172	1.141	Cellwall									UW	COG5604	Uncharacterized conserved protein
Q8CMP5	5-methyltetrahydropteroyltriglutamate--homocysteine methyltransferase OS=Staphylococcus epidermidis (strain ATCC 12228 / FDA PCI 1200) OX=176280 GN=metE PE=3 SV=1	metE	1.545	4.43259e-05	Up	85.928	48.5	34	4	100	0.79	1.2	1.231	1.177	0.75	0.796	Cytoplasmic	K00549	metE; 5-methyltetrahydropteroyltriglutamate--homocysteine methyltransferase [EC:2.1.1.14]	map00270 Cysteine and methionine metabolism; map00450 Selenocompound metabolism; map01100 Metabolic pathways; map01110 Biosynthesis of secondary metabolites; map01230 Biosynthesis of amino acids	GO:0000096 sulfur amino acid metabolic process; GO:0000097 sulfur amino acid biosynthetic process; GO:0006082 organic acid metabolic process; GO:0006464 cellular protein modification process; GO:0006479 protein methylation; GO:0006520 cellular amino acid metabolic process; GO:0006555 methionine metabolic process; GO:0006575 cellular modified amino acid metabolic process; GO:0006725 cellular aroma…	GO:0005576 extracellular region; GO:0005618 cell wall; GO:0005622 intracellular; GO:0005623 cell; GO:0005737 cytoplasm; GO:0005829 cytosol; GO:0005886 plasma membrane; GO:0016020 membrane; GO:0030312 external encapsulating structure; GO:0071944 cell periphery;	GO:0003824 catalytic activity; GO:0003871 5-methyltetrahydropteroyltriglutamate-homocysteine S-methyltransferase activity; GO:0008168 methyltransferase activity; GO:0008172 S-methyltransferase activity; GO:0008276 protein methyltransferase activity; GO:0008705 methionine synthase activity; GO:0016740 transferase activity; GO:0016741 transferase activity, transferring one-carbon groups; GO:0042084…	PF08267; PF01717	Cobalamin-independent synthase, N-terminal domain; Cobalamin-independent synthase, Catalytic domain	E	COG0620	Methionine synthase II (cobalamin-independent)
Q5HRR8	MTS domain-containing protein OS=Staphylococcus epidermidis (strain ATCC 35984 / RP62A) OX=176279 GN=SERP0125 PE=4 SV=1	SERP0125	1.304	0.0159488	Up	216.85	29.3	51	5	127	0.911	1.094	1.27	1.037	0.857	0.841	Cytoplasmic				GO:0008152 metabolic process; GO:0032259 methylation;	GO:0005622 intracellular; GO:0005623 cell; GO:0005737 cytoplasm; GO:0005829 cytosol;	GO:0003824 catalytic activity; GO:0008168 methyltransferase activity; GO:0008757 S-adenosylmethionine-dependent methyltransferase activity; GO:0016740 transferase activity; GO:0016741 transferase activity, transferring one-carbon groups;	PF05175	Methyltransferase small domain	S	COG4123	Predicted O-methyltransferase
A0A7H5C4X3	Beta-class phenol-soluble modulin OS=Staphylococcus epidermidis OX=1282 GN=F9B71_12500 PE=3 SV=1	F9B71_12500	0.648	0.000426486	Down	5.1308	78.4	2	2	7	1.274	0.847	0.747	0.802	1.227	1.198	Unknown	K20337	psmB; phenol-soluble modulin beta	map02024 Quorum sensing
Q5HM46	Uncharacterized protein OS=Staphylococcus epidermidis (strain ATCC 35984 / RP62A) OX=176279 GN=SERP1783 PE=4 SV=1	SERP1783	1.23	0.00438491	Up	9.1658	25.3	1	1	2	0.917	1.121	1.037	1.144	0.861	0.906	CytoplasmicMembrane									S	COG5547	Small integral membrane protein
A0A0H2VFH6	Uncharacterized protein OS=Staphylococcus epidermidis (strain ATCC 12228 / FDA PCI 1200) OX=176280 GN=SE_0693 PE=4 SV=1	SE_0693	0.82	0.00982459	Down	23.535	61.2	9	4	42	1.14	0.913	0.843	0.956	1.112	1.056	Cytoplasmic	K00799	GST, gst; glutathione S-transferase [EC:2.5.1.18]	map00480 Glutathione metabolism; map00983 Drug metabolism - other enzymes; map01100 Metabolic pathways				PF01928	CYTH domain	S	COG4116	Uncharacterized protein conserved in bacteria
Q5HS03	Trans-sulfuration enzyme family protein OS=Staphylococcus epidermidis (strain ATCC 35984 / RP62A) OX=176279 GN=SERP0036 PE=3 SV=1	SERP0036	1.55	4.57629e-06	Up	42.922	11.8	4	4	5	0.764	1.213	1.177	1.216	0.783	0.78	Cytoplasmic	K01760	metC; cysteine-S-conjugate beta-lyase [EC:4.4.1.13]	map00270 Cysteine and methionine metabolism; map00450 Selenocompound metabolism; map01100 Metabolic pathways; map01110 Biosynthesis of secondary metabolites; map01230 Biosynthesis of amino acids			GO:0003824 catalytic activity; GO:0003962 cystathionine gamma-synthase activity; GO:0004123 cystathionine gamma-lyase activity; GO:0016740 transferase activity; GO:0016765 transferase activity, transferring alkyl or aryl (other than methyl) groups; GO:0016829 lyase activity; GO:0016846 carbon-sulfur lyase activity;	PF01053	Cys/Met metabolism PLP-dependent enzyme	E	COG0626	Cystathionine beta-lyases/cystathionine gamma-synthases
A0A0E1VGP0	Lactose phosphotransferase system repressor OS=Staphylococcus epidermidis W23144 OX=525376 GN=HMPREF0791_0586 PE=4 SV=1	HMPREF0791_0586	1.266	0.0380219	Up	101.92	17	13	1	24	0.812	1.112	1.236	0.991	0.885	0.94	Cytoplasmic	K03436	fruR2, fruR; DeoR family transcriptional regulator, fructose operon transcriptional repressor					PF08220; PF00455	DeoR-like helix-turn-helix domain; DeoR C terminal sensor domain	K	COG1349	Transcriptional regulators of sugar metabolism
A0A4Y7VRU1	MarR family transcriptional regulator OS=Staphylococcus epidermidis OX=1282 GN=ATM22_02810 PE=4 SV=1	ATM22_02810	0.732	0.0053576	Down	13.59	75.4	11	2	37	1.16	0.861	0.761	0.926	1.163	1.156	Cytoplasmic				GO:0006355 regulation of transcription, DNA-templated; GO:0009889 regulation of biosynthetic process; GO:0010468 regulation of gene expression; GO:0010556 regulation of macromolecule biosynthetic process; GO:0019219 regulation of nucleobase-containing compound metabolic process; GO:0019222 regulation of metabolic process; GO:0031323 regulation of cellular metabolic process; GO:0031326 regulation …	GO:0005622 intracellular; GO:0005623 cell; GO:0005737 cytoplasm;	GO:0001067 regulatory region nucleic acid binding; GO:0003676 nucleic acid binding; GO:0003677 DNA binding; GO:0005488 binding; GO:0097159 organic cyclic compound binding; GO:1901363 heterocyclic compound binding;			K	COG1846	Transcriptional regulators
D2JCC2	ThiJ/PfpI family protein OS=Staphylococcus epidermidis OX=1282 GN=SAP107A_012 PE=3 SV=1	SAP107A_012	1.738	0.00580139	Up	18.807	46.5	7	1	24	0.607	1.182	1.332	1.243	0.702	0.853	Cytoplasmic	K05520	pfpI; protease I [EC:3.5.1.124]		GO:0006081 cellular aldehyde metabolic process; GO:0006082 organic acid metabolic process; GO:0006089 lactate metabolic process; GO:0006139 nucleobase-containing compound metabolic process; GO:0006259 DNA metabolic process; GO:0006281 DNA repair; GO:0006464 cellular protein modification process; GO:0006517 protein deglycosylation; GO:0006725 cellular aromatic compound metabolic process; GO:000680…	GO:0005622 intracellular; GO:0005623 cell; GO:0005737 cytoplasm; GO:0005829 cytosol;	GO:0003824 catalytic activity; GO:0005488 binding; GO:0005515 protein binding; GO:0016829 lyase activity; GO:0016835 carbon-oxygen lyase activity; GO:0016836 hydro-lyase activity; GO:0019172 glyoxalase III activity; GO:0036524 protein deglycase activity; GO:0042802 identical protein binding; GO:0140096 catalytic activity, acting on a protein;	PF01965	DJ-1/PfpI family	S	COG0693	Putative intracellular protease/amidase
D4FHM8	Peptidase M20 domain-containing protein 2 OS=Staphylococcus epidermidis M23864:W2(grey) OX=525375 GN=HMPREF0794_0066 PE=3 SV=1	HMPREF0794_0066	1.4	4.2975e-05	Up	43.061	28.2	9	7	18	0.822	1.12	1.186	1.152	0.832	0.816	Cytoplasmic							PF07687	Peptidase dimerisation domain	F	COG1473	Metal-dependent amidase/aminoacylase/carboxypeptidase
Q8CNC9	Urease subunit alpha OS=Staphylococcus epidermidis (strain ATCC 12228 / FDA PCI 1200) OX=176280 GN=ureC PE=3 SV=1	ureC	0.798	0.000109974	Down	62.084	67.1	23	23	138	1.138	0.906	0.894	0.882	1.129	1.092	Cytoplasmic	K01428	ureC; urease subunit alpha [EC:3.5.1.5]	map00220 Arginine biosynthesis; map00230 Purine metabolism; map00791 Atrazine degradation; map01100 Metabolic pathways; map01120 Microbial metabolism in diverse environments; map05120 Epithelial cell signaling in Helicobacter pylori infection				PF00449; PF01979	Urease alpha-subunit, N-terminal domain; Amidohydrolase family	E	COG0804	Urea amidohydrolase (urease) alpha subunit
Q5HQY7	Glycerate kinase family protein OS=Staphylococcus epidermidis (strain ATCC 35984 / RP62A) OX=176279 GN=SERP0409 PE=3 SV=1	SERP0409	0.819	0.0159389	Down	41.948	38.6	10	10	42	1.135	0.916	0.838	0.979	1.139	1.064	Cytoplasmic	K00865	glxK, garK; glycerate 2-kinase [EC:2.7.1.165]	map00260 Glycine, serine and threonine metabolism; map00561 Glycerolipid metabolism; map00630 Glyoxylate and dicarboxylate metabolism; map01100 Metabolic pathways; map01120 Microbial metabolism in diverse environments; map01130 Biosynthesis of antibiotics	GO:0005975 carbohydrate metabolic process; GO:0006082 organic acid metabolic process; GO:0006793 phosphorus metabolic process; GO:0006796 phosphate-containing compound metabolic process; GO:0008152 metabolic process; GO:0009056 catabolic process; GO:0009987 cellular process; GO:0016052 carbohydrate catabolic process; GO:0016054 organic acid catabolic process; GO:0016310 phosphorylation; GO:001714…		GO:0003824 catalytic activity; GO:0016301 kinase activity; GO:0016491 oxidoreductase activity; GO:0016661 oxidoreductase activity, acting on other nitrogenous compounds as donors; GO:0016662 oxidoreductase activity, acting on other nitrogenous compounds as donors, cytochrome as acceptor; GO:0016740 transferase activity; GO:0016772 transferase activity, transferring phosphorus-containing groups; G…			G	COG1929	Glycerate kinase
U6C115	HTH-type transcriptional regulator ArcR OS=Staphylococcus epidermidis OX=1282 PE=4 SV=1	--	0.67	0.000280366	Down	27.086	19.2	5	5	7	1.254	0.787	0.851	0.838	1.266	1.175	Cytoplasmic	K21828	arcR; CRP/FNR family transcriptional regulator, arginine deiminase pathway regulator					PF00027	Cyclic nucleotide-binding domain	T	COG0664	cAMP-binding proteins - catabolite gene activator and regulatory subunit of cAMP-dependent protein kinases
A0A7I0AWJ5	DUF3310 domain-containing protein OS=Staphylococcus epidermidis OX=1282 GN=E1N00_01035 PE=4 SV=1	E1N00_01035	0.727	0.0231203	Down	17.164	9.5	1	1	1	1.102	0.893	0.934	0.724	1.134	1.275	Cytoplasmic
Q8CT67	ClpXP adapter protein SpxH OS=Staphylococcus epidermidis (strain ATCC 12228 / FDA PCI 1200) OX=176280 GN=spxH PE=3 SV=2	spxH	1.353	0.0144258	Up	31.25	8.3	2	2	3	0.772	1.108	1.242	1.018	0.819	0.899	Cytoplasmic					GO:0005618 cell wall; GO:0005623 cell; GO:0030312 external encapsulating structure; GO:0071944 cell periphery;		PF13743	Thioredoxin	Q	COG2761	Predicted dithiol-disulfide isomerase involved in polyketide biosynthesis
Q8CTH8	7-cyano-7-deazaguanine synthase OS=Staphylococcus epidermidis (strain ATCC 12228 / FDA PCI 1200) OX=176280 GN=queC PE=3 SV=1	queC	1.275	0.000990393	Up	25.171	37.2	7	7	14	0.937	1.122	1.13	1.141	0.861	0.863	Cytoplasmic	K06920	queC; 7-cyano-7-deazaguanine synthase [EC:6.3.4.20]	map00790 Folate biosynthesis; map01100 Metabolic pathways				PF06508	ExsB	F	COG0603	Predicted PP-loop superfamily ATPase
Q5HKF6	Extracellular cysteine protease OS=Staphylococcus epidermidis (strain ATCC 35984 / RP62A) OX=176279 GN=ecpA PE=3 SV=1	ecpA	0.727	0.00138339	Down	44.701	7.6	4	3	4	1.207	0.825	0.82	0.914	1.182	1.129	Extracellular	K08258	sspB2, sspP, scpA; staphopain A [EC:3.4.22.48]
Q5HS17	Uncharacterized protein OS=Staphylococcus epidermidis (strain ATCC 35984 / RP62A) OX=176279 GN=SERP0022 PE=4 SV=1	SERP0022	0.833	0.000245025	Down	14.307	54.8	4	4	17	1.123	0.914	0.956	0.919	1.12	1.107	Unknown
Q8CPJ5	Carbamoyl-phosphate synthase small chain OS=Staphylococcus epidermidis (strain ATCC 12228 / FDA PCI 1200) OX=176280 GN=carA PE=3 SV=1	carA	0.647	0.0205672	Down	40.733	39.6	13	1	31	1.236	0.854	0.631	0.912	1.32	1.15	Cytoplasmic	K01956	carA, CPA1; carbamoyl-phosphate synthase small subunit [EC:6.3.5.5]	map00240 Pyrimidine metabolism; map00250 Alanine, aspartate and glutamate metabolism; map01100 Metabolic pathways	GO:0000050 urea cycle; GO:0006082 organic acid metabolic process; GO:0006520 cellular amino acid metabolic process; GO:0006525 arginine metabolic process; GO:0006526 arginine biosynthetic process; GO:0006807 nitrogen compound metabolic process; GO:0008152 metabolic process; GO:0008652 cellular amino acid biosynthetic process; GO:0009058 biosynthetic process; GO:0009064 glutamine family amino acid…	GO:0005622 intracellular; GO:0005623 cell; GO:0005737 cytoplasm; GO:0005951 carbamoyl-phosphate synthase complex; GO:0032991 protein-containing complex; GO:1902494 catalytic complex;		PF00988; PF00117	Carbamoyl-phosphate synthase small chain, CPSase domain; Glutamine amidotransferase class-I	F	COG0505	Carbamoylphosphate synthase small subunit
Q5HHB0	Chaperone protein ClpB OS=Staphylococcus aureus (strain COL) OX=93062 GN=clpB PE=3 SV=1	clpB	1.297	0.000511784	Up	98.302	28	23	2	63	0.872	1.172	1.121	1.083	0.849	0.881	Cytoplasmic	K03695	clpB; ATP-dependent Clp protease ATP-binding subunit ClpB		GO:0006508 proteolysis; GO:0006807 nitrogen compound metabolic process; GO:0008152 metabolic process; GO:0019538 protein metabolic process; GO:0043170 macromolecule metabolic process; GO:0044238 primary metabolic process; GO:0071704 organic substance metabolic process; GO:1901564 organonitrogen compound metabolic process;		GO:0005488 binding; GO:0005515 protein binding; GO:0042802 identical protein binding;	PF00004; PF07724; PF10431	ATPase family associated with various cellular activities (AAA); AAA domain (Cdc48 subfamily); C-terminal, D2-small domain, of ClpB protein	O	COG0542	ATPases with chaperone activity, ATP-binding subunit
Q5HQA3	Phosphoribosylformylglycinamidine synthase subunit PurS OS=Staphylococcus epidermidis (strain ATCC 35984 / RP62A) OX=176279 GN=purS PE=3 SV=1	purS	0.803	0.0174427	Down	9.793	59.3	3	3	19	1.093	0.92	0.824	0.973	1.192	1.097	Cytoplasmic	K23264	purS; phosphoribosylformylglycinamidine synthase subunit PurS [EC:6.3.5.3]	map00230 Purine metabolism; map01100 Metabolic pathways; map01110 Biosynthesis of secondary metabolites						F	COG1828	Phosphoribosylformylglycinamidine (FGAM) synthase, PurS component
Q5HQN8	5'-nucleotidase family protein OS=Staphylococcus epidermidis (strain ATCC 35984 / RP62A) OX=176279 GN=SERP0510 PE=3 SV=1	SERP0510	0.773	0.0280198	Down	50.01	25.7	9	9	13	1.224	0.832	0.807	1.004	1.1	1.095	Cellwall							PF00149; PF02872	Calcineurin-like phosphoesterase; 5'-nucleotidase, C-terminal domain	F	COG0737	5'-nucleotidase/2',3'-cyclic phosphodiesterase and related esterases
D4FJG6	2-oxoglutarate ferredoxin oxidoreductase subunit beta OS=Staphylococcus epidermidis M23864:W2(grey) OX=525375 GN=porB PE=4 SV=1	porB	1.225	0.0173359	Up	31.38	66.7	10	1	28	0.838	1.042	1.076	1.176	0.898	0.953	Cytoplasmic	K00175	korB, oorB, oforB; 2-oxoglutarate/2-oxoacid ferredoxin oxidoreductase subunit beta [EC:1.2.7.3 1.2.7.11]	map00010 Glycolysis / Gluconeogenesis; map00020 Citrate cycle (TCA cycle); map00620 Pyruvate metabolism; map00650 Butanoate metabolism; map00720 Carbon fixation pathways in prokaryotes; map01100 Metabolic pathways; map01110 Biosynthesis of secondary metabolites; map01120 Microbial metabolism in diverse environments; map01130 Biosynthesis of antibiotics; map01200 Carbon metabolism				PF02775	Thiamine pyrophosphate enzyme, C-terminal TPP binding domain	C	COG1013	Pyruvate:ferredoxin oxidoreductase and related 2-oxoacid:ferredoxin oxidoreductases, beta subunit
